# Supplementary material for: Sensory Geneidentificationin the Transcriptome of the Ectoparasitoid Quadrastichus Mendeliinthe Eucalyptus Gall wasp Leptocybe Invasa
Source: Research Square preprint supplement (doi:10.21203/rs.3.rs-123482/v1), 2020-12-11
Supplement: Supplementary file 1 [file b4eadae7047b54ae7d2c425e.xls]

## Sheet: Sequencing summary
A. Sequencing summary of the Quadrastichus mendeli transcriptome.
Sample name	Raw reads	Clean reads	Clean data (Gb)	Q20(%)	Q30(%)	GC content
CK1	24740386	21110044	3.71	94.03	89.45	45.79
CK2	22581498	19278188	3.39	94.13	89.65	45.22
CK3	29819798	25259462	4.47	93.85	89.11	45.06
CK4	25051518	18733252	3.76	92.75	88.45	53.01
CK5	26482834	22495242	3.97	93.94	89.31	45.26
CK6	26557838	22736816	3.98	94.36	90.08	45.18

## Sheet: Distribution list
B1. Length frequency distribution list of the Quadrastichus mendeli transcriptome.
Length range/bp	Contig	Transcript	Unigene
0-300	442916 (95.09%)	7976 (25.07%)	5859 (21.76%)
301-500	5879 (1.26%)	6191 (19.46%)	4816 (17.89%)
501-1000	5696 (1.22%)	5739 (18.04%)	4915 (18.25%)
1001-2000	5660 (1.22%)	5694 (17.89%)	5315 (19.74%)
>2001	11297 (2.43%)	11914 (37.44%)	11335 (42.10%)
Total number	465788	31820	26925
Total length/bp	66378092	39430660	36871436
N50 length/bp	1617	2356	2504
Mean length/bp	142.507	1239.18	1369.41

## Sheet: Annotation statistics
C. Annotated Unigene in the transcriptome of Quadrastichus mendeli.
Annotated	Number of annotated	Percentage of annotated
database	Unigenes	Unigenes
NR	15543	57.73
KO	7524	27.94
Swissport	11644	43.25
KOG	10924	40.57
GO	3578	13.29
Pfam	11660	43.31
Annotated in all databases	2392	8.88
Annotated in at least one database	15711	58.35
All	15623	0.5802

## Sheet: Top14-KEGG
D. The top 14 KEGG pathway of the Quadrastichus mendeli transcriptome.
KEGG_A_class	KEGG_B_class	Pathway	Count (3496)	Pathway ID	Genes	K_IDs
Metabolism	Global and Overview	Metabolic pathways	1079	ko01100	QM_comp00100;QM_comp00153;QM_comp00200;QM_comp00224;QM_comp00227;QM_comp00228;QM_comp00239;QM_comp00266;QM_comp00362;QM_comp00372;QM_comp00384;QM_comp00389;QM_comp00411;QM_comp00469;QM_comp00472;QM_comp00530;QM_comp00545;QM_comp00606;QM_comp00608;QM_comp00624;QM_comp00673;QM_comp00704;QM_comp00744;QM_comp00833;QM_comp00870;QM_comp00934;QM_comp00945;QM_comp00965;QM_comp01020;QM_comp01025;QM_comp01…	K00868+K00876+K01194+K00314+K11205+K00972+K03883+K01950+K01183+K00981+K00710+K01895+K00264+K01106+K00734+K05858+K16055+K00699+K00106+K00314+K03018+K18201+K01176+K00993+K00411+K00011+K12670+K00913+K13510+K01109+K00252+K03946+K11353+K01187+K00699+K01074+K01081+K19572+K01081+K00759+K00699+K00699+K00699+K00665+K00665+K00665+K00665+K00665+K02151+K00699+K00036+K02152+K00115+K00228+K00787+K01081+K01908+…
Metabolism	Global and Overview	Biosynthesis of secondary metabolites	352	ko01110	QM_comp00372;QM_comp00389;QM_comp00411;QM_comp00606;QM_comp00608;QM_comp00833;QM_comp01089;QM_comp01155;QM_comp01202;QM_comp01227;QM_comp01254;QM_comp01287;QM_comp01386;QM_comp01393;QM_comp01514;QM_comp01525;QM_comp01547;QM_comp01556;QM_comp01676;QM_comp01685;QM_comp01769;QM_comp01860;QM_comp01888;QM_comp01912;QM_comp01971;QM_comp02051;QM_comp02112;QM_comp02310;QM_comp02315;QM_comp02442;QM_comp02…	K00981+K01895+K00264+K00699+K00106+K00993+K00699+K01081+K01081+K00699+K00699+K00699+K00699+K00036+K00115+K00228+K00787+K01081+K00940+K07508+K13509+K00030+K01081+K10703+K00699+K01623+K01081+K01047+K13523+K01053+K01081+K10106+K11517+K00948+K11517+K00699+K00166+K01195+K00819+K01081+K00699+K01835+K16343+K00804+K00804+K08683+K08683+K10106+K00036+K00789+K01081+K01081+K01081+K14157+K00789+K00789+K00134+…
Genetic Information Processing	Translation	Ribosome	267	ko03010	QM_comp00425;QM_comp00877;QM_comp01043;QM_comp01178;QM_comp01200;QM_comp01883;QM_comp01923;QM_comp01989;QM_comp02177;QM_comp02231;QM_comp02313;QM_comp02412;QM_comp02431;QM_comp02452;QM_comp02465;QM_comp02540;QM_comp02574;QM_comp02587;QM_comp02606;QM_comp02725;QM_comp02906;QM_comp03061;QM_comp03153;QM_comp03159;QM_comp03174;QM_comp03218;QM_comp03334;QM_comp03371;QM_comp03420;QM_comp03538;QM_comp03…	K02876+K02983+K02959+K02894+K02927+K02885+K02878+K02937+K02889+K02970+K02941+K02881+K02987+K02898+K02918+K02865+K02976+K02940+K02872+K02877+K02947+K02938+K02923+K02930+K02866+K02971+K02980+K02927+K02993+K02984+K02922+K02905+K02943+K02969+K02959+K02883+K02883+K02873+K02956+K02966+K02951+K02890+K02974+K02958+K02981+K02981+K02958+K02983+K02901+K02883+K02924+K02873+K02872+K02894+K02894+K02899+K02973+…
Metabolism	Global and Overview	Biosynthesis of antibiotics	207	ko01130	QM_comp00228;QM_comp00389;QM_comp00411;QM_comp00427;QM_comp01026;QM_comp01393;QM_comp01514;QM_comp01547;QM_comp01676;QM_comp01685;QM_comp01860;QM_comp02051;QM_comp02442;QM_comp02632;QM_comp02680;QM_comp02701;QM_comp02902;QM_comp03118;QM_comp03691;QM_comp03830;QM_comp03831;QM_comp03945;QM_comp03946;QM_comp04239;QM_comp04573;QM_comp04941;QM_comp05169;QM_comp05170;QM_comp05430;QM_comp05444;QM_comp05…	K00972+K01895+K00264+K05955+K00252+K00036+K00115+K00787+K00940+K07508+K00030+K01623+K01053+K11517+K00948+K11517+K00166+K00819+K01835+K00804+K00804+K08683+K08683+K00036+K14157+K00134+K00134+K00134+K00234+K00615+K01679+K01679+K01681+K11517+K01053+K01689+K01689+K01620+K00237+K00026+K00030+K01836+K01836+K07515+K00030+K08658+K00830+K00830+K00804+K00281+K00939+K01758+K00963+K01823+K07511+K00235+K01476+…
Genetic Information Processing	Folding, sorting and degradation	Protein processing in endoplasmic reticulum	181	ko04141	QM_comp00171;QM_comp00373;QM_comp00945;QM_comp00993;QM_comp01103;QM_comp01660;QM_comp01719;QM_comp01891;QM_comp01901;QM_comp01908;QM_comp01976;QM_comp02022;QM_comp02093;QM_comp02475;QM_comp02500;QM_comp02663;QM_comp02977;QM_comp03050;QM_comp03154;QM_comp03504;QM_comp03510;QM_comp03958;QM_comp04201;QM_comp04203;QM_comp04211;QM_comp04243;QM_comp04253;QM_comp04254;QM_comp04360;QM_comp04726;QM_comp04…	K04079+K03283+K12670+K14016+K11718+K14007+K05546+K16194+K10597+K11863+K04374+K14003+K03283+K16194+K01230+K03283+K10578+K14007+K09490+K09542+K08057+K03283+K09580+K03868+K04079+K10950+K04079+K04079+K04079+K09584+K04079+K08054+K06689+K01228+K12668+K04571+K10100+K10100+K09486+K03237+K09525+K09485+K09521+K04554+K16194+K16194+K04426+K14004+K09517+K10080+K07953+K09556+K13989+K01456+K01456+K01456+K04431+…
Genetic Information Processing	Translation	RNA transport	176	ko03013	QM_comp00068;QM_comp00352;QM_comp01218;QM_comp01364;QM_comp01391;QM_comp01610;QM_comp01671;QM_comp01884;QM_comp01916;QM_comp02118;QM_comp02122;QM_comp02615;QM_comp02731;QM_comp03283;QM_comp03759;QM_comp03760;QM_comp03903;QM_comp04173;QM_comp04182;QM_comp04205;QM_comp04404;QM_comp04638;QM_comp04774;QM_comp05418;QM_comp05541;QM_comp05577;QM_comp05678;QM_comp05735;QM_comp06022;QM_comp06544;QM_comp06…	K03238+K03241+K14285+K12881+K12812+K14320+K03242+K03249+K03251+K03248+K12875+K14285+K18644+K12881+K13130+K13130+K02516+K12881+K03250+K03257+K03231+K12160+K14324+K03262+K12172+K03247+K03537+K12881+K03113+K03237+K12812+K12812+K14322+K14300+K03231+K03231+K03239+K12881+K12876+K03231+K03231+K12877+K13129+K12881+K14004+K12881+K12812+K14319+K03236+K13136+K14293+K14294+K13134+K13134+K03245+K03245+K12881+…
Metabolism	Global and Overview	Microbial metabolism in diverse environments	174	ko01120	QM_comp00389;QM_comp00394;QM_comp00411;QM_comp00608;QM_comp01026;QM_comp01393;QM_comp01705;QM_comp01860;QM_comp02051;QM_comp02442;QM_comp02632;QM_comp02680;QM_comp02701;QM_comp03460;QM_comp03691;QM_comp04239;QM_comp04692;QM_comp04941;QM_comp05169;QM_comp05170;QM_comp05430;QM_comp05444;QM_comp05514;QM_comp05515;QM_comp05632;QM_comp05638;QM_comp05797;QM_comp05957;QM_comp05958;QM_comp05965;QM_comp06…	K01895+K01512+K00264+K00106+K00252+K00036+K00814+K00030+K01623+K01053+K11517+K00948+K11517+K01466+K01835+K00036+K00029+K00134+K00134+K00134+K00234+K00615+K01679+K01679+K01681+K11517+K01053+K01689+K01689+K01620+K00237+K00026+K00106+K00030+K08738+K01719+K01915+K07515+K00030+K00049+K01958+K01958+K01958+K07127+K00830+K00830+K00029+K00029+K01749+K00297+K07511+K00235+K01785+K01900+K01900+K01915+K00850+…
Cellular Processes	Transport and catabolism	Lysosome	170	ko04142	QM_comp00241;QM_comp00275;QM_comp00489;QM_comp01142;QM_comp01270;QM_comp01486;QM_comp01591;QM_comp01699;QM_comp02100;QM_comp02103;QM_comp02104;QM_comp02518;QM_comp02533;QM_comp02705;QM_comp02709;QM_comp02747;QM_comp02868;QM_comp03077;QM_comp03248;QM_comp03286;QM_comp03478;QM_comp03599;QM_comp04043;QM_comp04640;QM_comp04909;QM_comp05352;QM_comp05663;QM_comp05670;QM_comp05746;QM_comp05747;QM_comp06…	K01379+K12394+K01365+K01074+K12307+K01379+K06528+K03662+K01204+K01204+K01204+K19363+K12386+K12347+K01052+K01052+K19363+K01195+K01052+K01363+K12382+K19363+K01052+K19363+K01052+K01368+K01052+K19363+K12350+K12350+K01373+K01052+K01365+K19363+K13443+K19363+K12382+K12382+K10532+K10532+K10532+K01379+K13443+K01365+K01365+K01365+K01365+K12389+K12389+K12389+K19363+K01195+K01365+K01444+K12399+K12392+K12373+…
Genetic Information Processing	Transcription	Spliceosome	164	ko03040	QM_comp00373;QM_comp01160;QM_comp01364;QM_comp01391;QM_comp01553;QM_comp01709;QM_comp01711;QM_comp01824;QM_comp02093;QM_comp02122;QM_comp02244;QM_comp02579;QM_comp02663;QM_comp02808;QM_comp03198;QM_comp03283;QM_comp03353;QM_comp03748;QM_comp03865;QM_comp03958;QM_comp03995;QM_comp03998;QM_comp04173;QM_comp04414;QM_comp04683;QM_comp05345;QM_comp05346;QM_comp05390;QM_comp05642;QM_comp05735;QM_comp05…	K03283+K12857+K12881+K12812+K12866+K12813+K12837+K12863+K03283+K12875+K12852+K12624+K03283+K12848+K12859+K12881+K12862+K12861+K12871+K03283+K11088+K12834+K12881+K12859+K11097+K12820+K12820+K11096+K11088+K12881+K12823+K12843+K12843+K11099+K12819+K12812+K12812+K11086+K12836+K12833+K12826+K12873+K12881+K12876+K12877+K11984+K12881+K12881+K12812+K12622+K12832+K12621+K09564+K12886+K11087+K12826+K12836+…
Cellular Processes	Transport and catabolism	Endocytosis	162	ko04144	QM_comp00016;QM_comp00226;QM_comp00373;QM_comp00501;QM_comp00693;QM_comp01179;QM_comp01360;QM_comp01482;QM_comp01645;QM_comp01701;QM_comp01746;QM_comp01914;QM_comp02026;QM_comp02093;QM_comp02185;QM_comp02205;QM_comp02376;QM_comp02572;QM_comp02663;QM_comp02862;QM_comp03001;QM_comp03473;QM_comp03482;QM_comp03593;QM_comp03898;QM_comp03950;QM_comp03958;QM_comp04237;QM_comp04569;QM_comp05010;QM_comp05…	K18466+K04707+K03283+K01528+K18441+K12492+K12196+K18467+K00910+K12483+K17918+K10365+K12197+K03283+K05126+K12190+K12186+K07876+K03283+K07901+K12196+K18441+K12185+K06643+K18443+K12476+K03283+K05093+K18442+K19367+K06093+K06093+K12487+K12484+K05126+K11839+K11839+K05126+K12186+K07937+K05747+K01115+K04705+K04513+K12494+K12196+K04237+K07903+K18465+K11866+K12183+K12195+K11827+K18441+K04513+K18465+K12194+…
Metabolism	Nucleotide metabolism	Purine metabolism	161	ko00230	QM_comp00054;QM_comp00268;QM_comp00608;QM_comp00673;QM_comp01155;QM_comp01165;QM_comp01202;QM_comp01224;QM_comp01556;QM_comp01676;QM_comp01767;QM_comp01777;QM_comp01888;QM_comp01889;QM_comp01975;QM_comp01996;QM_comp02112;QM_comp02483;QM_comp02680;QM_comp02763;QM_comp03055;QM_comp03147;QM_comp03316;QM_comp03460;QM_comp03691;QM_comp03858;QM_comp04512;QM_comp04513;QM_comp04514;QM_comp04898;QM_comp05…	K01769+K00962+K00106+K03018+K01081+K19572+K01081+K00759+K01081+K00940+K14721+K00856+K01081+K01769+K12319+K10808+K01081+K01081+K00948+K12323+K18437+K03027+K01081+K01466+K01835+K03015+K01081+K01081+K01081+K02685+K03020+K13758+K01487+K01487+K01487+K02328+K00106+K12304+K03022+K03011+K03011+K01769+K01081+K03008+K01081+K13763+K07127+K01081+K02326+K03783+K03016+K03016+K03016+K03016+K00939+K19572+K13988+…
Metabolism	Energy metabolism	Oxidative phosphorylation	150	ko00190	QM_comp00239;QM_comp00870;QM_comp01041;QM_comp01050;QM_comp01375;QM_comp01450;QM_comp01466;QM_comp01699;QM_comp01775;QM_comp01790;QM_comp01833;QM_comp02000;QM_comp02119;QM_comp02121;QM_comp02165;QM_comp02409;QM_comp02627;QM_comp02702;QM_comp02850;QM_comp03725;QM_comp03780;QM_comp04111;QM_comp04138;QM_comp04286;QM_comp04423;QM_comp04424;QM_comp04872;QM_comp04884;QM_comp04942;QM_comp05128;QM_comp05…	K03883+K00411+K03946+K11353+K02151+K02270+K02152+K03662+K03943+K02127+K02149+K02127+K02261+K03951+K02270+K03881+K03968+K03940+K03881+K02262+K02130+K02268+K03878+K03965+K00413+K00413+K03938+K02128+K02127+K02261+K03935+K03878+K00234+K11351+K02272+K02272+K00237+K03878+K02258+K02128+K02128+K00418+K02126+K03945+K03883+K03883+K03961+K02134+K02270+K03881+K03881+K03882+K02265+K02267+K02267+K03948+K03966+…
Genetic Information Processing	Folding, sorting and degradation	Ubiquitin mediated proteolysis	127	ko04120	QM_comp00226;QM_comp00392;QM_comp00393;QM_comp00456;QM_comp00583;QM_comp00873;QM_comp01566;QM_comp01728;QM_comp01901;QM_comp02160;QM_comp02653;QM_comp02977;QM_comp03165;QM_comp03240;QM_comp03574;QM_comp03593;QM_comp03921;QM_comp03959;QM_comp03978;QM_comp03979;QM_comp04143;QM_comp04203;QM_comp05311;QM_comp05478;QM_comp05757;QM_comp06098;QM_comp06212;QM_comp07042;QM_comp07830;QM_comp08091;QM_comp08…	K04707+K10595+K10595+K03357+K07868+K03870+K10582+K10582+K10597+K04506+K04552+K10578+K03876+K10582+K10586+K06643+K03876+K04506+K10684+K10684+K10605+K03868+K03354+K06689+K03349+K10686+K03353+K04554+K10456+K10687+K03355+K04725+K16061+K04725+K03870+K10579+K03873+K10588+K03094+K03094+K04506+K03094+K09561+K10582+K03349+K04506+K10606+K03362+K03350+K03350+K03350+K10598+K10600+K10589+K10577+K03094+K04506+…
Metabolism	Global and Overview	Carbon metabolism	119	ko01200	QM_comp00389;QM_comp01393;QM_comp01705;QM_comp01860;QM_comp02051;QM_comp02442;QM_comp02632;QM_comp02680;QM_comp02701;QM_comp03139;QM_comp04239;QM_comp04692;QM_comp04941;QM_comp05169;QM_comp05170;QM_comp05430;QM_comp05444;QM_comp05514;QM_comp05515;QM_comp05632;QM_comp05638;QM_comp05797;QM_comp05957;QM_comp05958;QM_comp06044;QM_comp06085;QM_comp06261;QM_comp07627;QM_comp07808;QM_comp08001;QM_comp08…	K01895+K00036+K00814+K00030+K01623+K01053+K11517+K00948+K11517+K05605+K00036+K00029+K00134+K00134+K00134+K00234+K00615+K01679+K01679+K01681+K11517+K01053+K01689+K01689+K00237+K00026+K00030+K07515+K00030+K01958+K01958+K01958+K00830+K00830+K00029+K00029+K00281+K00297+K07511+K00140+K00235+K01900+K01900+K00850+K00658+K00058+K00161+K01783+K00616+K14455+K01070+K01807+K00030+K01053+K00161+K14454+K11517+…
Environmental Information Processing	Signal transduction	MAPK signaling pathway - fly	ko04013		MS|comp152165_c1,MS|comp162825_c0,MS|comp141855_c0,MS|comp157733_c0,MS|comp162554_c0,MS|comp158243_c0,MS|comp152470_c0,MS|comp157133_c0,MS|comp165052_c0,MS|comp159634_c0,MS|comp145653_c0,MS|comp157947_c0,MS|comp161903_c0,MS|comp165204_c1,MS|comp140632_c0,MS|comp163171_c0,MS|comp165316_c0,MS|comp166700_c0,MS|comp160162_c0
Environmental Information Processing	Signal transduction	MAPK signaling pathway - yeast	ko04011		MS|comp157493_c0,MS|comp491056_c0,MS|comp155284_c0,MS|comp160132_c1,MS|comp55313_c0,MS|comp163645_c0,MS|comp155284_c1,MS|comp1047562_c0,MS|comp166577_c0,MS|comp738680_c0,MS|comp141479_c0,MS|comp1210908_c0,MS|comp164674_c0,MS|comp163782_c0
Environmental Information Processing	Signal transduction	NF-kappa B signaling pathway	ko04064		MS|comp163373_c1,MS|comp1388584_c0,MS|comp160544_c1,MS|comp164057_c0,MS|comp163770_c0,MS|comp157895_c0,MS|comp166034_c0,MS|comp163373_c0,MS|comp128578_c0,MS|comp161898_c0,MS|comp162269_c0
Environmental Information Processing	Signal transduction	Notch signaling pathway	ko04330		MS|comp140487_c0,MS|comp159379_c0,MS|comp59305_c0,MS|comp152714_c0,MS|comp72036_c0,MS|comp166091_c0,MS|comp149578_c0,MS|comp164906_c0,MS|comp153710_c0,MS|comp166757_c3,MS|comp154075_c0,MS|comp160946_c0,MS|comp154670_c0,MS|comp159000_c1,MS|comp158651_c0,MS|comp166873_c1,MS|comp154182_c0,MS|comp150519_c0,MS|comp145519_c0,MS|comp160045_c0,MS|comp162897_c0,MS|comp166518_c0,MS|comp159599_c0,MS|comp133…
Environmental Information Processing	Signal transduction	Phosphatidylinositol signaling system	ko04070		MS|comp156629_c1,MS|comp160984_c0,MS|comp945191_c0,MS|comp160022_c0,MS|comp162559_c0,MS|comp162137_c0,MS|comp163557_c2,MS|comp166819_c0,MS|comp142724_c0,MS|comp155496_c0,MS|comp154315_c0,MS|comp163130_c0,MS|comp165937_c0,MS|comp156569_c0,MS|comp116364_c0,MS|comp160262_c0,MS|comp60737_c0,MS|comp166756_c1,MS|comp160756_c0,MS|comp142657_c0,MS|comp144592_c0,MS|comp152765_c0,MS|comp161652_c1,MS|comp83…
Environmental Information Processing	Signal transduction	Plant hormone signal transduction	ko04075		MS|comp153887_c0,MS|comp2568397_c0,MS|comp647089_c0
Environmental Information Processing	Signal transduction	Rap1 signaling pathway	ko04015		MS|comp166871_c2,MS|comp161950_c0,MS|comp149594_c0,MS|comp150399_c0,MS|comp159081_c0,MS|comp123313_c0,MS|comp495424_c0,MS|comp165204_c1,MS|comp166034_c0,MS|comp162648_c0,MS|comp165647_c1,MS|comp96178_c0,MS|comp157493_c0,MS|comp152470_c0,MS|comp157733_c0,MS|comp1065971_c0,MS|comp165647_c0,MS|comp162655_c0,MS|comp164674_c0,MS|comp162422_c0,MS|comp159581_c0,MS|comp165826_c0,MS|comp165121_c0,MS|comp1…
Environmental Information Processing	Signal transduction	Ras signaling pathway	ko04014		MS|comp164057_c0,MS|comp164674_c0,MS|comp162655_c0,MS|comp119376_c0,MS|comp157733_c0,MS|comp162554_c0,MS|comp152470_c0,MS|comp593454_c0,MS|comp157493_c0,MS|comp165611_c1,MS|comp96178_c0,MS|comp116114_c0,MS|comp162648_c0,MS|comp160966_c0,MS|comp166034_c0,MS|comp495424_c0,MS|comp123313_c0,MS|comp165204_c1,MS|comp151505_c0,MS|comp153258_c0,MS|comp166060_c0,MS|comp163133_c0,MS|comp160162_c0,MS|comp15…
Environmental Information Processing	Signal transduction	TGF-beta signaling pathway	ko04350		MS|comp164014_c0,MS|comp738680_c0,MS|comp159379_c0,MS|comp318680_c0,MS|comp157464_c0,MS|comp164275_c0,MS|comp162872_c0,MS|comp150124_c0,MS|comp157709_c0,MS|comp162444_c0,MS|comp166757_c3,MS|comp160450_c0,MS|comp118662_c0,MS|comp160915_c0,MS|comp2559128_c0,MS|comp165999_c0,MS|comp162571_c0,MS|comp161954_c0,MS|comp164054_c0,MS|comp163636_c0,MS|comp157492_c0,MS|comp162614_c0,MS|comp161903_c0,MS|comp…
Environmental Information Processing	Signal transduction	TNF signaling pathway	ko04668		MS|comp163130_c0,MS|comp147693_c0,MS|comp165798_c1,MS|comp161840_c0,MS|comp164055_c0,MS|comp165798_c0,MS|comp162801_c0,MS|comp1388584_c0,MS|comp163373_c1,MS|comp164057_c0,MS|comp164885_c0,MS|comp160409_c0,MS|comp157837_c0,MS|comp118245_c0,MS|comp163373_c0,MS|comp160262_c0,MS|comp165316_c0,MS|comp164164_c0,MS|comp160942_c0,MS|comp159455_c0,MS|comp162269_c0,MS|comp164150_c0,MS|comp163860_c0,MS|comp…
Environmental Information Processing	Signal transduction	Two-component system	ko02020		MS|comp1611865_c0,MS|comp311222_c0,MS|comp1179595_c0,MS|comp2475245_c0,MS|comp1516685_c0,MS|comp988339_c0,MS|comp939270_c0,MS|comp164531_c0,MS|comp105772_c0,MS|comp1721622_c0,MS|comp1654633_c0,MS|comp154775_c0,MS|comp159150_c1,MS|comp818013_c0,MS|comp745443_c0,MS|comp2399417_c0,MS|comp369888_c0,MS|comp1519548_c0,MS|comp19976_c0,MS|comp413429_c0,MS|comp1180896_c0,MS|comp662381_c0,MS|comp1689044_c0…
Environmental Information Processing	Signal transduction	VEGF signaling pathway	ko04370		MS|comp160262_c0,MS|comp157733_c0,MS|comp147429_c0,MS|comp163127_c0,MS|comp164674_c0,MS|comp166648_c0,MS|comp159694_c0,MS|comp157493_c0,MS|comp160380_c0,MS|comp147693_c0,MS|comp55313_c0,MS|comp163130_c0,MS|comp147868_c0,MS|comp163677_c0,MS|comp161903_c0,MS|comp123313_c0,MS|comp166034_c0,MS|comp155764_c0,MS|comp166542_c0,MS|comp165227_c1,MS|comp115646_c0,MS|comp165316_c0
Environmental Information Processing	Signal transduction	Wnt signaling pathway	ko04310		MS|comp1584621_c0,MS|comp164761_c1,MS|comp95901_c0,MS|comp159455_c0,MS|comp154381_c0,MS|comp163557_c2,MS|comp59305_c0,MS|comp163677_c0,MS|comp142724_c0,MS|comp161398_c1,MS|comp162818_c0,MS|comp145078_c0,MS|comp164561_c1,MS|comp163373_c1,MS|comp163770_c0,MS|comp141479_c0,MS|comp160409_c0,MS|comp147429_c0,MS|comp166329_c0,MS|comp156929_c0,MS|comp161909_c0,MS|comp162093_c0,MS|comp128578_c0,MS|comp14…
Environmental Information Processing	Signal transduction	mTOR signaling pathway	ko04150		MS|comp144941_c0,MS|comp147339_c0,MS|comp166004_c0,MS|comp135564_c0,MS|comp151860_c0,MS|comp147693_c0,MS|comp55313_c0,MS|comp156927_c0,MS|comp147162_c0,MS|comp129322_c0,MS|comp124911_c0,MS|comp156927_c1,MS|comp129322_c1,MS|comp155944_c0,MS|comp143301_c0,MS|comp154631_c0,MS|comp155945_c0,MS|comp149819_c0,MS|comp160262_c0,MS|comp161473_c0,MS|comp145499_c0,MS|comp162400_c0,MS|comp137350_c0,MS|comp16…
Environmental Information Processing	Signaling molecules and interaction	Cell adhesion molecules (CAMs)	ko04514		MS|comp164484_c0,MS|comp159326_c0,MS|comp150514_c1,MS|comp150823_c0,MS|comp166828_c0,MS|comp154486_c0,MS|comp101492_c0,MS|comp146949_c0,MS|comp162987_c0,MS|comp164522_c0,MS|comp525501_c0,MS|comp164850_c1,MS|comp166679_c0,MS|comp156749_c1,MS|comp165917_c0,MS|comp80867_c0,MS|comp155020_c0,MS|comp143088_c0,MS|comp649037_c0,MS|comp107245_c0,MS|comp68911_c0,MS|comp165293_c0,MS|comp165563_c0,MS|comp164…
Environmental Information Processing	Signaling molecules and interaction	Cytokine-cytokine receptor interaction	ko04060		MS|comp162872_c0,MS|comp318680_c0,MS|comp166188_c0,MS|comp160450_c0,MS|comp165204_c1,MS|comp163669_c0,MS|comp153315_c0,MS|comp784318_c0,MS|comp152470_c0,MS|comp166659_c1,MS|comp161954_c0
Environmental Information Processing	Signaling molecules and interaction	ECM-receptor interaction	ko04512		MS|comp159326_c0,MS|comp164774_c0,MS|comp161562_c0,MS|comp166227_c0,MS|comp159994_c0,MS|comp166879_c0,MS|comp166331_c2,MS|comp166695_c0,MS|comp142072_c0,MS|comp150341_c0,MS|comp162178_c0,MS|comp166792_c0,MS|comp156536_c0,MS|comp162199_c0,MS|comp166634_c0,MS|comp155414_c0,MS|comp143088_c0,MS|comp151688_c0,MS|comp163413_c0,MS|comp166255_c0,MS|comp165563_c0,MS|comp166331_c1,MS|comp143976_c0,MS|comp8…
Environmental Information Processing	Signaling molecules and interaction	Neuroactive ligand-receptor interaction	ko04080		MS|comp605888_c0,MS|comp300403_c0,MS|comp359644_c0,MS|comp1340819_c0,MS|comp163656_c0,MS|comp158405_c1,MS|comp160063_c0,MS|comp148326_c0,MS|comp151943_c0,MS|comp133892_c0,MS|comp1065971_c0,MS|comp146788_c0,MS|comp156656_c0,MS|comp155697_c0,MS|comp156925_c0,MS|comp158955_c0,MS|comp18376_c0,MS|comp79119_c0,MS|comp101166_c0,MS|comp153779_c0,MS|comp275627_c0,MS|comp577606_c0,MS|comp164718_c0,MS|comp1…
Genetic Information Processing	Folding, sorting and degradation	Proteasome	ko03050		MS|comp73766_c0,MS|comp159711_c1,MS|comp158564_c0,MS|comp1372498_c0,MS|comp162937_c0,MS|comp162708_c0,MS|comp164434_c2,MS|comp163797_c0,MS|comp2606874_c0,MS|comp156858_c0,MS|comp160771_c0,MS|comp164443_c0,MS|comp154071_c0,MS|comp162842_c0,MS|comp152437_c0,MS|comp163708_c0,MS|comp953728_c0,MS|comp158121_c1,MS|comp1964676_c0,MS|comp156499_c0,MS|comp163604_c0,MS|comp164012_c3,MS|comp141738_c0,MS|com…
Genetic Information Processing	Folding, sorting and degradation	Protein export	ko03060		MS|comp1651770_c0,MS|comp155210_c0,MS|comp151436_c0,MS|comp164002_c0,MS|comp162443_c0,MS|comp1207809_c0,MS|comp1615993_c0,MS|comp2850246_c0,MS|comp114662_c0,MS|comp559598_c0,MS|comp1615394_c0,MS|comp157489_c0,MS|comp154683_c0,MS|comp161972_c1,MS|comp3624226_c0,MS|comp2256571_c0,MS|comp2982884_c0,MS|comp7604_c0,MS|comp31183_c0,MS|comp1017107_c0,MS|comp2444643_c0,MS|comp2229981_c0,MS|comp1518347_c0…
Genetic Information Processing	Folding, sorting and degradation	RNA degradation	ko03018		MS|comp1200458_c0,MS|comp139330_c0,MS|comp1148948_c0,MS|comp141285_c0,MS|comp1600852_c0,MS|comp156880_c0,MS|comp159651_c0,MS|comp154361_c0,MS|comp164590_c0,MS|comp1619198_c0,MS|comp1391294_c0,MS|comp48707_c0,MS|comp1602833_c0,MS|comp155872_c0,MS|comp1462920_c0,MS|comp163239_c0,MS|comp2446286_c0,MS|comp141731_c0,MS|comp156706_c0,MS|comp1203110_c0,MS|comp164923_c0,MS|comp159286_c1,MS|comp2244100_c0…
Genetic Information Processing	Folding, sorting and degradation	SNARE interactions in vesicular transport	ko04130		MS|comp162750_c0,MS|comp155694_c0,MS|comp155677_c0,MS|comp156670_c0,MS|comp164094_c0,MS|comp161698_c0,MS|comp161653_c0,MS|comp165636_c0,MS|comp159272_c0,MS|comp161404_c0,MS|comp159740_c0,MS|comp157162_c0,MS|comp141630_c0,MS|comp159258_c0,MS|comp161565_c0,MS|comp163036_c0,MS|comp156716_c0,MS|comp157494_c0,MS|comp163363_c0,MS|comp159458_c0,MS|comp163292_c0
Genetic Information Processing	Folding, sorting and degradation	Sulfur relay system	ko04122		MS|comp165336_c0,MS|comp1574733_c0,MS|comp64669_c0,MS|comp443203_c0,MS|comp165897_c0,MS|comp900962_c0,MS|comp55689_c0,MS|comp35861_c0,MS|comp2859552_c0,MS|comp2786082_c0,MS|comp1225047_c0,MS|comp160808_c0,MS|comp159897_c0,MS|comp148771_c0,MS|comp149597_c0,MS|comp147918_c0,MS|comp164122_c0,MS|comp1210270_c0
Genetic Information Processing	Folding, sorting and degradation	Ubiquitin mediated proteolysis	ko04120		MS|comp156145_c0,MS|comp165078_c1,MS|comp159436_c0,MS|comp160630_c0,MS|comp159606_c0,MS|comp162233_c0,MS|comp143600_c0,MS|comp137862_c0,MS|comp129235_c0,MS|comp165540_c0,MS|comp165176_c0,MS|comp156828_c0,MS|comp151029_c1,MS|comp153259_c0,MS|comp100851_c0,MS|comp359557_c0,MS|comp157596_c0,MS|comp129603_c0,MS|comp165751_c0,MS|comp161067_c0,MS|comp122013_c0,MS|comp156137_c0,MS|comp162492_c0,MS|comp1…
Genetic Information Processing	Replication and repair	Base excision repair	ko03410		MS|comp162811_c0,MS|comp558313_c0,MS|comp83504_c0,MS|comp909670_c0,MS|comp154454_c0,MS|comp162142_c0,MS|comp164960_c0,MS|comp1561429_c0,MS|comp115985_c0,MS|comp162661_c0,MS|comp1511581_c0,MS|comp77072_c0,MS|comp1383716_c0,MS|comp158349_c0,MS|comp7708_c0,MS|comp752069_c0,MS|comp148132_c0,MS|comp105383_c0,MS|comp159226_c0,MS|comp151811_c0,MS|comp165719_c0,MS|comp141485_c0,MS|comp153072_c0,MS|comp15…
Genetic Information Processing	Replication and repair	DNA replication	ko03030		MS|comp83504_c0,MS|comp558313_c0,MS|comp164960_c0,MS|comp156899_c1,MS|comp757011_c0,MS|comp151367_c0,MS|comp1064107_c0,MS|comp77072_c0,MS|comp165682_c0,MS|comp752069_c0,MS|comp105383_c0,MS|comp164134_c0,MS|comp161846_c0,MS|comp149619_c0,MS|comp164319_c0,MS|comp151811_c0,MS|comp153072_c0,MS|comp149653_c0,MS|comp165407_c1,MS|comp120176_c0,MS|comp124196_c0,MS|comp2307483_c0,MS|comp150094_c1,MS|comp7…
Genetic Information Processing	Replication and repair	Fanconi anemia pathway	ko03460		MS|comp145066_c0,MS|comp165407_c1,MS|comp157693_c0,MS|comp135476_c0,MS|comp102884_c0,MS|comp149431_c0,MS|comp164134_c0,MS|comp140030_c0,MS|comp142481_c0,MS|comp71341_c0,MS|comp1232570_c0,MS|comp162932_c0,MS|comp144691_c1,MS|comp115346_c0,MS|comp133370_c0,MS|comp96056_c0,MS|comp76845_c0,MS|comp142749_c0,MS|comp152348_c0,MS|comp159035_c0,MS|comp1198996_c0,MS|comp131692_c0,MS|comp151889_c0,MS|comp14…
Genetic Information Processing	Replication and repair	Homologous recombination	ko03440		MS|comp163716_c0,MS|comp1919500_c0,MS|comp1252852_c0,MS|comp2436088_c0,MS|comp899860_c0,MS|comp7031_c0,MS|comp136228_c0,MS|comp154660_c0,MS|comp105383_c1,MS|comp84164_c0,MS|comp2365869_c0,MS|comp741490_c0,MS|comp2471863_c0,MS|comp81340_c0,MS|comp145337_c0,MS|comp161185_c0,MS|comp550670_c0,MS|comp157137_c0,MS|comp159056_c0,MS|comp645532_c0,MS|comp108634_c0,MS|comp143717_c0,MS|comp166177_c0,MS|comp…
Genetic Information Processing	Replication and repair	Mismatch repair	ko03430		MS|comp154823_c0,MS|comp114037_c0,MS|comp597390_c0,MS|comp139203_c0,MS|comp83037_c0,MS|comp142525_c0,MS|comp1571099_c0,MS|comp159056_c0,MS|comp161627_c0,MS|comp1636189_c0,MS|comp2685719_c0,MS|comp158507_c0,MS|comp2471863_c0,MS|comp2436088_c0,MS|comp129251_c0,MS|comp150060_c0,MS|comp2962472_c0,MS|comp1647957_c0,MS|comp161846_c0,MS|comp152169_c0,MS|comp153699_c0,MS|comp142481_c0,MS|comp164134_c0,MS…
Genetic Information Processing	Replication and repair	Non-homologous end-joining	ko03450		MS|comp909670_c0,MS|comp155442_c0,MS|comp166177_c0,MS|comp144000_c0,MS|comp162986_c0,MS|comp80958_c0,MS|comp2962472_c0,MS|comp158032_c0,MS|comp1383716_c0,MS|comp162490_c0
Genetic Information Processing	Replication and repair	Nucleotide excision repair	ko03420		MS|comp2501559_c0,MS|comp162811_c0,MS|comp161216_c0,MS|comp154454_c0,MS|comp1383716_c0,MS|comp166098_c0,MS|comp2303370_c0,MS|comp7708_c0,MS|comp146516_c0,MS|comp1626357_c0,MS|comp163504_c0,MS|comp158507_c0,MS|comp84164_c0,MS|comp149250_c0,MS|comp162911_c0,MS|comp156528_c0,MS|comp133906_c0,MS|comp157464_c0,MS|comp7031_c0,MS|comp164509_c0,MS|comp383086_c0,MS|comp163543_c0,MS|comp597390_c0,MS|comp11…
Genetic Information Processing	Transcription	Basal transcription factors	ko03022		MS|comp160757_c0,MS|comp162289_c0,MS|comp158861_c0,MS|comp153064_c0,MS|comp99674_c0,MS|comp162110_c1,MS|comp160244_c0,MS|comp162902_c0,MS|comp159354_c0,MS|comp157559_c0,MS|comp158140_c0,MS|comp150711_c0,MS|comp153940_c0,MS|comp152663_c0,MS|comp148090_c0,MS|comp160467_c0,MS|comp163543_c0,MS|comp160619_c0,MS|comp157373_c0,MS|comp157424_c1,MS|comp1329557_c0,MS|comp166098_c0,MS|comp160606_c0,MS|comp1…
Genetic Information Processing	Transcription	RNA polymerase	ko03020		MS|comp158591_c0,MS|comp162982_c0,MS|comp916928_c0,MS|comp161892_c0,MS|comp139905_c0,MS|comp1605249_c0,MS|comp1227446_c0,MS|comp82726_c0,MS|comp155127_c0,MS|comp161112_c0,MS|comp131265_c0,MS|comp448510_c0,MS|comp166722_c1,MS|comp145799_c0,MS|comp161892_c1,MS|comp1372978_c0,MS|comp144582_c0,MS|comp964523_c0,MS|comp840029_c0,MS|comp10225_c0,MS|comp131342_c0,MS|comp164048_c0,MS|comp156367_c0,MS|comp…
Genetic Information Processing	Translation	Aminoacyl-tRNA biosynthesis	ko00970		MS|comp1605161_c0,MS|comp1607581_c0,MS|comp166388_c1,MS|comp631328_c0,MS|comp553122_c0,MS|comp2252652_c0,MS|comp161657_c0,MS|comp151739_c0,MS|comp159210_c0,MS|comp2434096_c0,MS|comp1843031_c0,MS|comp164147_c0,MS|comp1160424_c0,MS|comp157370_c0,MS|comp1638288_c0,MS|comp2196439_c0,MS|comp149052_c1,MS|comp3013181_c0,MS|comp816042_c0,MS|comp165486_c0,MS|comp166197_c0,MS|comp164619_c0,MS|comp1553894_c…
Genetic Information Processing	Translation	RNA transport	ko03013		MS|comp153590_c0,MS|comp166477_c1,MS|comp163883_c0,MS|comp154699_c0,MS|comp85860_c0,MS|comp157933_c0,MS|comp158804_c0,MS|comp162662_c0,MS|comp161516_c0,MS|comp128498_c0,MS|comp160324_c0,MS|comp149822_c0,MS|comp163650_c0,MS|comp151734_c0,MS|comp158716_c0,MS|comp166383_c0,MS|comp164206_c1,MS|comp480013_c0,MS|comp147149_c1,MS|comp157708_c0,MS|comp141420_c0,MS|comp159938_c0,MS|comp159966_c0,MS|comp16…
Genetic Information Processing	Translation	Ribosome	ko03010		MS|comp116314_c0,MS|comp1861109_c0,MS|comp1876653_c0,MS|comp116198_c0,MS|comp1555999_c0,MS|comp115966_c0,MS|comp394967_c0,MS|comp950427_c0,MS|comp134401_c0,MS|comp95849_c0,MS|comp1147438_c0,MS|comp1566659_c0,MS|comp30678_c0,MS|comp2536767_c0,MS|comp141264_c0,MS|comp91574_c0,MS|comp552363_c0,MS|comp2507343_c0,MS|comp85285_c0,MS|comp166914_c0,MS|comp90456_c0,MS|comp159769_c0,MS|comp394580_c0,MS|com…
Genetic Information Processing	Translation	Ribosome biogenesis in eukaryotes	ko03008		MS|comp157673_c0,MS|comp122756_c0,MS|comp154361_c0,MS|comp1570806_c0,MS|comp158178_c0,MS|comp158983_c0,MS|comp1613932_c0,MS|comp146311_c0,MS|comp128578_c0,MS|comp163719_c1,MS|comp141174_c0,MS|comp150466_c0,MS|comp161876_c0,MS|comp164284_c0,MS|comp163714_c0,MS|comp156203_c0,MS|comp159681_c0,MS|comp156797_c0,MS|comp161375_c0,MS|comp160988_c0,MS|comp165044_c0,MS|comp154160_c0,MS|comp11117_c0,MS|comp…
Genetic Information Processing	Translation	mRNA surveillance pathway	ko03015		MS|comp1148948_c0,MS|comp154000_c0,MS|comp164206_c0,MS|comp148870_c0,MS|comp165770_c0,MS|comp141303_c0,MS|comp158892_c0,MS|comp130854_c0,MS|comp153009_c0,MS|comp158535_c0,MS|comp2559128_c0,MS|comp159803_c0,MS|comp166211_c0,MS|comp164703_c0,MS|comp166284_c0,MS|comp165797_c2,MS|comp152554_c0,MS|comp166638_c0,MS|comp160830_c0,MS|comp161375_c0,MS|comp161407_c1,MS|comp162383_c0,MS|comp1142266_c0,MS|co…
Metabolism	Amino acid metabolism	Alanine, aspartate and glutamate metabolism	ko00250		MS|comp2908754_c0,MS|comp651746_c0,MS|comp166844_c0,MS|comp2634537_c0,MS|comp164439_c0,MS|comp1339741_c0,MS|comp1294771_c0,MS|comp160330_c0,MS|comp1179597_c0,MS|comp160009_c0,MS|comp1531620_c0,MS|comp2610837_c0,MS|comp164363_c0,MS|comp780663_c0,MS|comp163262_c2,MS|comp165225_c2,MS|comp843909_c0,MS|comp73202_c0,MS|comp712419_c0,MS|comp146946_c0,MS|comp165281_c0,MS|comp2517931_c0,MS|comp2453531_c0,…
Metabolism	Amino acid metabolism	Arginine and proline metabolism	ko00330		MS|comp1434798_c0,MS|comp1224249_c0,MS|comp816130_c0,MS|comp140663_c0,MS|comp2474711_c0,MS|comp1246530_c0,MS|comp107526_c0,MS|comp5974_c0,MS|comp644762_c0,MS|comp629302_c0,MS|comp73582_c0,MS|comp160501_c0,MS|comp164291_c0,MS|comp2236575_c0,MS|comp1200790_c0,MS|comp150787_c0,MS|comp2718461_c0,MS|comp1245737_c0,MS|comp158117_c1,MS|comp150787_c1,MS|comp166648_c0,MS|comp2254694_c0,MS|comp161387_c0,MS…
Metabolism	Amino acid metabolism	Cysteine and methionine metabolism	ko00270		MS|comp1202961_c0,MS|comp32780_c0,MS|comp534472_c0,MS|comp158453_c0,MS|comp1622905_c0,MS|comp1594393_c0,MS|comp163404_c0,MS|comp2175033_c0,MS|comp159438_c0,MS|comp67184_c0,MS|comp163388_c1,MS|comp95603_c0,MS|comp2654362_c0,MS|comp25058_c0,MS|comp937028_c0,MS|comp158526_c0,MS|comp160501_c0,MS|comp426503_c0,MS|comp2596605_c0,MS|comp759404_c0,MS|comp1621246_c0,MS|comp161356_c0,MS|comp150678_c0,MS|co…
Metabolism	Amino acid metabolism	Histidine metabolism	ko00340		MS|comp161387_c1,MS|comp159356_c0,MS|comp160006_c0,MS|comp165258_c0,MS|comp1617393_c0,MS|comp1450623_c0,MS|comp29057_c0,MS|comp162456_c0,MS|comp535385_c0,MS|comp116792_c0,MS|comp162861_c0,MS|comp2703896_c0,MS|comp40035_c0,MS|comp1579266_c0,MS|comp1531871_c0,MS|comp123989_c0,MS|comp1144639_c0,MS|comp551407_c0,MS|comp147901_c0,MS|comp155376_c0,MS|comp50442_c0,MS|comp1021957_c0,MS|comp2511770_c0,MS|…
Metabolism	Amino acid metabolism	Lysine biosynthesis	ko00300		MS|comp127317_c0,MS|comp2496912_c0,MS|comp2227603_c0,MS|comp937028_c0,MS|comp1377645_c0,MS|comp2596605_c0,MS|comp1621246_c0,MS|comp1594393_c0,MS|comp34204_c0,MS|comp1576691_c0,MS|comp2654362_c0,MS|comp3972821_c0,MS|comp770933_c0,MS|comp894730_c0,MS|comp2625343_c0,MS|comp162456_c0,MS|comp2402627_c0
Metabolism	Amino acid metabolism	Lysine degradation	ko00310		MS|comp1184354_c0,MS|comp164460_c0,MS|comp161923_c0,MS|comp1595227_c0,MS|comp50442_c0,MS|comp641107_c0,MS|comp166363_c0,MS|comp107858_c0,MS|comp1649149_c0,MS|comp151066_c0,MS|comp157464_c1,MS|comp132860_c0,MS|comp163429_c0,MS|comp2227603_c0,MS|comp1689044_c0,MS|comp150580_c0,MS|comp162048_c0,MS|comp153189_c0,MS|comp166014_c0,MS|comp1793526_c0,MS|comp161387_c1,MS|comp1176235_c0,MS|comp1648300_c0,M…
Metabolism	Amino acid metabolism	Phenylalanine metabolism	ko00360		MS|comp1429148_c0,MS|comp151412_c0,MS|comp155728_c0,MS|comp163913_c0,MS|comp696430_c0,MS|comp147901_c0,MS|comp4694_c0,MS|comp162465_c0,MS|comp166171_c0,MS|comp1012173_c0,MS|comp159325_c0,MS|comp1648300_c0,MS|comp1536650_c0,MS|comp12659_c0,MS|comp750847_c0,MS|comp165258_c0,MS|comp166095_c0,MS|comp135827_c0,MS|comp160815_c2,MS|comp569802_c0,MS|comp103932_c0,MS|comp1482079_c0,MS|comp471756_c0,MS|com…
Metabolism	Amino acid metabolism	Phenylalanine, tyrosine and tryptophan biosynthesis	ko00400		MS|comp163913_c0,MS|comp1216917_c0,MS|comp1186844_c0,MS|comp4694_c0,MS|comp162465_c0,MS|comp135827_c0,MS|comp160815_c2,MS|comp518773_c0,MS|comp1878653_c0,MS|comp12659_c0,MS|comp1331206_c0,MS|comp1375101_c0,MS|comp1195907_c0,MS|comp1274012_c0,MS|comp1022344_c0,MS|comp102263_c0,MS|comp162963_c0,MS|comp1259668_c0,MS|comp2569940_c0,MS|comp664897_c0,MS|comp2254694_c0,MS|comp737019_c0,MS|comp1360594_c0…
Metabolism	Amino acid metabolism	Tryptophan metabolism	ko00380		MS|comp1184354_c0,MS|comp165939_c0,MS|comp1595227_c0,MS|comp50442_c0,MS|comp641107_c0,MS|comp824684_c0,MS|comp161271_c1,MS|comp164706_c0,MS|comp122039_c0,MS|comp155134_c0,MS|comp2227603_c0,MS|comp156086_c0,MS|comp151066_c0,MS|comp166014_c0,MS|comp163258_c0,MS|comp1793526_c0,MS|comp153189_c0,MS|comp1689044_c0,MS|comp159065_c0,MS|comp162248_c0,MS|comp584050_c0,MS|comp1648300_c0,MS|comp1176235_c0,MS…
Metabolism	Amino acid metabolism	Tyrosine metabolism	ko00350		MS|comp159325_c0,MS|comp164351_c0,MS|comp166171_c0,MS|comp4694_c0,MS|comp147901_c0,MS|comp2703896_c0,MS|comp1678388_c0,MS|comp158674_c0,MS|comp163913_c0,MS|comp151412_c0,MS|comp149957_c0,MS|comp165328_c0,MS|comp1427208_c0,MS|comp166171_c2,MS|comp1450623_c0,MS|comp1482079_c0,MS|comp160815_c2,MS|comp135827_c0,MS|comp159356_c0,MS|comp1739692_c0,MS|comp165258_c0,MS|comp12659_c0,MS|comp163097_c0,MS|co…
Metabolism	Amino acid metabolism	Valine, leucine and isoleucine biosynthesis	ko00290		MS|comp893852_c0,MS|comp923098_c0,MS|comp387878_c0,MS|comp891043_c0,MS|comp854237_c0,MS|comp10820_c0,MS|comp1268828_c0,MS|comp1215641_c0,MS|comp627707_c0,MS|comp906319_c0,MS|comp1371334_c0,MS|comp156784_c1,MS|comp57019_c0,MS|comp1658211_c0,MS|comp1024350_c0,MS|comp163180_c0,MS|comp547975_c0,MS|comp468926_c0,MS|comp2300615_c0,MS|comp1352840_c0,MS|comp1705109_c0,MS|comp1596385_c0,MS|comp1538192_c0,…
Metabolism	Amino acid metabolism	Valine, leucine and isoleucine degradation	ko00280		MS|comp1128782_c0,MS|comp27281_c0,MS|comp1648300_c0,MS|comp588809_c0,MS|comp920620_c0,MS|comp154783_c1,MS|comp161387_c1,MS|comp118106_c0,MS|comp2354635_c0,MS|comp1176235_c0,MS|comp153189_c0,MS|comp157615_c0,MS|comp1793526_c0,MS|comp1589982_c0,MS|comp166014_c0,MS|comp162771_c0,MS|comp1689044_c0,MS|comp1050166_c0,MS|comp159150_c1,MS|comp818013_c0,MS|comp159941_c0,MS|comp163012_c0,MS|comp160642_c0,M…
Metabolism	Biosynthesis of other secondary metabolites	Aflatoxin biosynthesis	ko00254		MS|comp160678_c0,MS|comp165888_c0,MS|comp166550_c0,MS|comp165888_c1
Metabolism	Biosynthesis of other secondary metabolites	Betalain biosynthesis	ko00965		MS|comp122039_c0,MS|comp155134_c0,MS|comp1610772_c0,MS|comp142964_c0,MS|comp165939_c0,MS|comp147901_c0,MS|comp159811_c0
Metabolism	Biosynthesis of other secondary metabolites	Butirosin and neomycin biosynthesis	ko00524		MS|comp163296_c0,MS|comp164549_c0
Metabolism	Biosynthesis of other secondary metabolites	Caffeine metabolism	ko00232		MS|comp151689_c0,MS|comp148819_c0,MS|comp162185_c0,MS|comp164690_c1,MS|comp165464_c1,MS|comp147616_c0,MS|comp150781_c0,MS|comp143046_c0
Metabolism	Biosynthesis of other secondary metabolites	Flavone and flavonol biosynthesis	ko00944		MS|comp164974_c0
Metabolism	Biosynthesis of other secondary metabolites	Indole alkaloid biosynthesis	ko00901		MS|comp159811_c0,MS|comp147901_c0,MS|comp165939_c0,MS|comp142964_c0,MS|comp122039_c0,MS|comp155134_c0
Metabolism	Biosynthesis of other secondary metabolites	Isoquinoline alkaloid biosynthesis	ko00950		MS|comp162963_c0,MS|comp2254694_c0,MS|comp149957_c0,MS|comp163913_c0,MS|comp426503_c0,MS|comp780663_c0,MS|comp147901_c0,MS|comp4694_c0,MS|comp122039_c0,MS|comp155134_c0,MS|comp142964_c0,MS|comp12659_c0,MS|comp135827_c0,MS|comp160815_c2,MS|comp534472_c0,MS|comp159811_c0,MS|comp165939_c0
Metabolism	Biosynthesis of other secondary metabolites	Novobiocin biosynthesis	ko00401		MS|comp737019_c0,MS|comp135827_c0,MS|comp102263_c0,MS|comp426503_c0,MS|comp162963_c0,MS|comp4694_c0,MS|comp2569940_c0
Metabolism	Biosynthesis of other secondary metabolites	Penicillin and cephalosporin biosynthesis	ko00311		MS|comp161791_c0
Metabolism	Biosynthesis of other secondary metabolites	Phenylpropanoid biosynthesis	ko00940		MS|comp86882_c0,MS|comp957060_c0,MS|comp156864_c0,MS|comp155728_c0,MS|comp156068_c0,MS|comp166095_c0,MS|comp696430_c0,MS|comp744170_c0,MS|comp569802_c0,MS|comp103932_c0,MS|comp158286_c0,MS|comp159026_c0,MS|comp162114_c0,MS|comp100317_c0
Metabolism	Biosynthesis of other secondary metabolites	Stilbenoid, diarylheptanoid and gingerol biosynthesis	ko00945		MS|comp1295808_c0,MS|comp159426_c0
Metabolism	Biosynthesis of other secondary metabolites	Streptomycin biosynthesis	ko00521		MS|comp162688_c0,MS|comp1570740_c0,MS|comp680384_c0,MS|comp1491_c0,MS|comp912107_c0,MS|comp162295_c0,MS|comp1635486_c0,MS|comp165154_c1,MS|comp166258_c0,MS|comp164549_c0,MS|comp165154_c0,MS|comp163296_c0,MS|comp159842_c0
Metabolism	Biosynthesis of other secondary metabolites	Tropane, piperidine and pyridine alkaloid biosynthesis	ko00960		MS|comp4694_c0,MS|comp780663_c0,MS|comp426503_c0,MS|comp1180743_c0,MS|comp737019_c0,MS|comp76656_c0,MS|comp162963_c0,MS|comp1175335_c0,MS|comp2254694_c0,MS|comp135827_c0,MS|comp163913_c0,MS|comp157511_c0,MS|comp102263_c0,MS|comp160815_c2
Metabolism	Carbohydrate metabolism	Amino sugar and nucleotide sugar metabolism	ko00520		MS|comp2417462_c0,MS|comp165278_c1,MS|comp19965_c0,MS|comp101964_c0,MS|comp161498_c0,MS|comp160638_c0,MS|comp159223_c0,MS|comp2481004_c0,MS|comp165154_c1,MS|comp652965_c0,MS|comp842156_c0,MS|comp910905_c0,MS|comp2319654_c0,MS|comp166003_c0,MS|comp158228_c0,MS|comp2292058_c0,MS|comp163260_c0,MS|comp166557_c0,MS|comp1578014_c0,MS|comp158359_c0,MS|comp2225660_c0,MS|comp897702_c0,MS|comp151937_c0,MS|…
Metabolism	Carbohydrate metabolism	Ascorbate and aldarate metabolism	ko00053		MS|comp165671_c1,MS|comp50442_c0,MS|comp160520_c0,MS|comp163345_c0,MS|comp103265_c0,MS|comp157794_c0,MS|comp361090_c0,MS|comp159887_c0,MS|comp151066_c0,MS|comp150787_c1,MS|comp158117_c1,MS|comp87779_c0,MS|comp146556_c0,MS|comp162891_c0,MS|comp161391_c0,MS|comp2227603_c0,MS|comp161387_c0,MS|comp2457788_c0,MS|comp161377_c0,MS|comp160339_c2,MS|comp150787_c0,MS|comp1578014_c0,MS|comp161387_c1,MS|comp…
Metabolism	Carbohydrate metabolism	Butanoate metabolism	ko00650		MS|comp164918_c0,MS|comp153189_c0,MS|comp4773_c0,MS|comp1435046_c0,MS|comp159150_c0,MS|comp1793526_c0,MS|comp166014_c0,MS|comp628556_c0,MS|comp162771_c0,MS|comp1689044_c0,MS|comp4468_c0,MS|comp44571_c0,MS|comp686572_c0,MS|comp1648300_c0,MS|comp1658211_c0,MS|comp118106_c0,MS|comp632308_c0,MS|comp1176235_c0,MS|comp1179595_c0,MS|comp38599_c0,MS|comp3440957_c0,MS|comp164351_c0,MS|comp155815_c0,MS|com…
Metabolism	Carbohydrate metabolism	C5-Branched dibasic acid metabolism	ko00660		MS|comp1608417_c0,MS|comp2343394_c0,MS|comp1658211_c0,MS|comp893852_c0,MS|comp906319_c0,MS|comp1052198_c0,MS|comp54414_c0
Metabolism	Carbohydrate metabolism	Citrate cycle (TCA cycle)	ko00020		MS|comp44571_c0,MS|comp160990_c0,MS|comp609858_c0,MS|comp164114_c0,MS|comp78807_c0,MS|comp160666_c0,MS|comp1655868_c0,MS|comp158480_c1,MS|comp686572_c0,MS|comp1605872_c0,MS|comp911789_c0,MS|comp163715_c0,MS|comp1203889_c0,MS|comp38599_c0,MS|comp1780278_c0,MS|comp816780_c0,MS|comp527332_c0,MS|comp136240_c0,MS|comp165024_c1,MS|comp435823_c0,MS|comp1009829_c0,MS|comp83404_c0,MS|comp1598963_c0,MS|com…
Metabolism	Carbohydrate metabolism	Fructose and mannose metabolism	ko00051		MS|comp2270288_c0,MS|comp166172_c0,MS|comp161283_c0,MS|comp157876_c0,MS|comp162810_c1,MS|comp158228_c0,MS|comp151894_c0,MS|comp163296_c0,MS|comp151603_c0,MS|comp164549_c0,MS|comp157203_c0,MS|comp157981_c0,MS|comp165564_c0,MS|comp157421_c0,MS|comp161017_c0,MS|comp1190335_c0,MS|comp159957_c0,MS|comp64365_c0,MS|comp154732_c0,MS|comp139972_c0,MS|comp875841_c0,MS|comp162810_c0,MS|comp1077532_c0,MS|com…
Metabolism	Carbohydrate metabolism	Galactose metabolism	ko00052		MS|comp498307_c0,MS|comp2292058_c0,MS|comp162566_c1,MS|comp164848_c1,MS|comp161283_c0,MS|comp117478_c0,MS|comp2225660_c0,MS|comp912107_c0,MS|comp748523_c0,MS|comp161445_c0,MS|comp164549_c0,MS|comp164348_c1,MS|comp115898_c0,MS|comp151894_c0,MS|comp1190335_c0,MS|comp163253_c0,MS|comp1570740_c0,MS|comp156062_c0,MS|comp159061_c0,MS|comp161073_c0,MS|comp162295_c0,MS|comp1515174_c0,MS|comp161625_c0,MS|…
Metabolism	Carbohydrate metabolism	Glyoxylate and dicarboxylate metabolism	ko00630		MS|comp818013_c0,MS|comp745443_c0,MS|comp1149390_c0,MS|comp159150_c1,MS|comp81511_c0,MS|comp2997655_c0,MS|comp540225_c0,MS|comp164113_c0,MS|comp160392_c0,MS|comp411642_c0,MS|comp1179595_c0,MS|comp161335_c0,MS|comp988339_c0,MS|comp2504832_c0,MS|comp162220_c0,MS|comp1176235_c0,MS|comp387895_c0,MS|comp166410_c1,MS|comp162248_c0,MS|comp158480_c0,MS|comp1689044_c0,MS|comp159065_c0,MS|comp2256802_c0,MS…
Metabolism	Carbohydrate metabolism	Inositol phosphate metabolism	ko00562		MS|comp152327_c0,MS|comp162710_c0,MS|comp142657_c0,MS|comp164359_c1,MS|comp144592_c0,MS|comp2354635_c0,MS|comp160754_c0,MS|comp160756_c0,MS|comp166034_c0,MS|comp1179951_c0,MS|comp152765_c0,MS|comp166507_c0,MS|comp159161_c2,MS|comp165881_c0,MS|comp166540_c0,MS|comp159472_c0,MS|comp164004_c0,MS|comp159161_c1,MS|comp1491_c0,MS|comp140219_c1,MS|comp154946_c0,MS|comp157470_c0,MS|comp166572_c0,MS|comp1…
Metabolism	Carbohydrate metabolism	Pentose and glucuronate interconversions	ko00040		MS|comp150787_c0,MS|comp138509_c0,MS|comp153441_c0,MS|comp151066_c0,MS|comp158117_c1,MS|comp150787_c1,MS|comp87779_c0,MS|comp159564_c0,MS|comp161391_c0,MS|comp161387_c0,MS|comp159061_c1,MS|comp146556_c0,MS|comp155064_c0,MS|comp162891_c0,MS|comp1693085_c0,MS|comp157794_c0,MS|comp103265_c0,MS|comp361090_c0,MS|comp159887_c0,MS|comp50442_c0,MS|comp165671_c1,MS|comp1255679_c0,MS|comp165278_c1,MS|comp1…
Metabolism	Carbohydrate metabolism	Pentose phosphate pathway	ko00030		MS|comp161803_c1,MS|comp912107_c0,MS|comp165564_c0,MS|comp147729_c0,MS|comp163448_c0,MS|comp1386809_c0,MS|comp161803_c0,MS|comp156010_c0,MS|comp166557_c0,MS|comp162810_c1,MS|comp1153806_c0,MS|comp134183_c0,MS|comp164016_c0,MS|comp816462_c0,MS|comp1201347_c0,MS|comp162810_c0,MS|comp87511_c0,MS|comp2535206_c0,MS|comp162295_c0,MS|comp159499_c0,MS|comp83803_c0,MS|comp160712_c1,MS|comp1204347_c0,MS|co…
Metabolism	Carbohydrate metabolism	Propanoate metabolism	ko00640		MS|comp130030_c0,MS|comp164359_c1,MS|comp160666_c0,MS|comp1204149_c0,MS|comp162456_c0,MS|comp548622_c0,MS|comp4773_c0,MS|comp159150_c0,MS|comp1179951_c0,MS|comp1531871_c0,MS|comp116792_c0,MS|comp1531939_c0,MS|comp165888_c1,MS|comp3440957_c0,MS|comp773545_c0,MS|comp162859_c0,MS|comp120180_c0,MS|comp1521041_c0,MS|comp1864873_c0,MS|comp1356072_c0,MS|comp161387_c0,MS|comp2479600_c0,MS|comp1049051_c0,…
Metabolism	Carbohydrate metabolism	Starch and sucrose metabolism	ko00500		MS|comp1692967_c0,MS|comp4820_c0,MS|comp158713_c0,MS|comp332758_c0,MS|comp1667420_c0,MS|comp163468_c0,MS|comp163296_c0,MS|comp38429_c0,MS|comp957060_c0,MS|comp162189_c0,MS|comp165278_c0,MS|comp164903_c0,MS|comp477947_c0,MS|comp81023_c0,MS|comp161710_c0,MS|comp685756_c0,MS|comp1529039_c0,MS|comp165584_c1,MS|comp166347_c1,MS|comp160531_c0,MS|comp163345_c0,MS|comp1596590_c0,MS|comp83425_c0,MS|comp12…
Metabolism	Energy metabolism	Carbon fixation in photosynthetic organisms	ko00710		MS|comp904432_c0,MS|comp67184_c0,MS|comp2314025_c0,MS|comp2175033_c0,MS|comp128230_c0,MS|comp2733929_c0,MS|comp2339068_c0,MS|comp2252965_c0,MS|comp830187_c0,MS|comp383142_c0,MS|comp157554_c0,MS|comp1202961_c0,MS|comp95568_c0,MS|comp556667_c0,MS|comp1643467_c0,MS|comp101746_c0,MS|comp10477_c0,MS|comp2510773_c0,MS|comp2254694_c0,MS|comp73202_c0,MS|comp130504_c0,MS|comp165624_c0,MS|comp110621_c0,MS|…
Metabolism	Energy metabolism	Carbon fixation pathways in prokaryotes	ko00720		MS|comp1793526_c0,MS|comp548622_c0,MS|comp4773_c0,MS|comp768290_c0,MS|comp159150_c0,MS|comp2226154_c0,MS|comp44571_c0,MS|comp160990_c0,MS|comp1689044_c0,MS|comp1128782_c0,MS|comp2342564_c0,MS|comp166410_c1,MS|comp820544_c0,MS|comp686572_c0,MS|comp155512_c0,MS|comp1176235_c0,MS|comp165024_c1,MS|comp1179595_c0,MS|comp1519954_c0,MS|comp2645760_c0,MS|comp38599_c0,MS|comp1780278_c0,MS|comp1550363_c0,M…
Metabolism	Energy metabolism	Methane metabolism	ko00680		MS|comp161976_c0,MS|comp556667_c0,MS|comp2239141_c0,MS|comp740163_c0,MS|comp1356072_c0,MS|comp95568_c0,MS|comp904432_c0,MS|comp160625_c0,MS|comp840515_c0,MS|comp128230_c0,MS|comp156240_c0,MS|comp10550_c0,MS|comp641062_c0,MS|comp161507_c0,MS|comp158867_c0,MS|comp162179_c1,MS|comp4024442_c0,MS|comp1871015_c0,MS|comp156366_c0,MS|comp2651567_c0,MS|comp164115_c0,MS|comp2502798_c0,MS|comp160731_c0,MS|c…
Metabolism	Energy metabolism	Nitrogen metabolism	ko00910		MS|comp1194448_c0,MS|comp745443_c0,MS|comp988339_c0,MS|comp935384_c0,MS|comp387895_c0,MS|comp409423_c0,MS|comp11009_c0,MS|comp466643_c0,MS|comp31567_c0,MS|comp2256802_c0,MS|comp2345452_c0,MS|comp158017_c0,MS|comp1191679_c0,MS|comp1369693_c0,MS|comp162855_c0,MS|comp1140268_c0,MS|comp163262_c2,MS|comp653595_c0,MS|comp1322993_c0,MS|comp166578_c0,MS|comp1619256_c0,MS|comp2289325_c0,MS|comp1179597_c0,…
Metabolism	Energy metabolism	Photosynthesis	ko00195		MS|comp446026_c0,MS|comp501587_c0,MS|comp55634_c0,MS|comp759156_c0,MS|comp742768_c0,MS|comp10822_c0,MS|comp1161149_c0,MS|comp943617_c0,MS|comp649187_c0,MS|comp1283563_c0,MS|comp415670_c0,MS|comp2505860_c0,MS|comp1258879_c0
Metabolism	Energy metabolism	Sulfur metabolism	ko00920		MS|comp49779_c0,MS|comp741333_c0,MS|comp2491796_c0,MS|comp2713223_c0,MS|comp1524397_c0,MS|comp1067023_c0,MS|comp153302_c0,MS|comp160924_c0,MS|comp157945_c0,MS|comp160478_c0,MS|comp1185369_c0,MS|comp165850_c1,MS|comp115273_c0,MS|comp3107780_c0,MS|comp14896_c0,MS|comp594970_c0
Metabolism	Glycan biosynthesis and metabolism	Glycosaminoglycan biosynthesis - chondroitin sulfate / dermatan sulfate	ko00532		MS|comp164345_c0,MS|comp152526_c0,MS|comp163720_c1,MS|comp153652_c0,MS|comp147580_c0
Metabolism	Glycan biosynthesis and metabolism	Glycosaminoglycan biosynthesis - heparan sulfate / heparin	ko00534		MS|comp164968_c0,MS|comp157759_c0,MS|comp162138_c0,MS|comp153652_c0,MS|comp152526_c0,MS|comp146028_c1,MS|comp165539_c0,MS|comp129320_c0,MS|comp137617_c0,MS|comp143158_c1,MS|comp1330557_c0,MS|comp151049_c0,MS|comp163720_c1,MS|comp163178_c0,MS|comp152241_c0,MS|comp151711_c0,MS|comp146028_c0,MS|comp147580_c0,MS|comp147092_c0
Metabolism	Glycan biosynthesis and metabolism	Glycosaminoglycan biosynthesis - keratan sulfate	ko00533		MS|comp165920_c0,MS|comp39075_c0,MS|comp163874_c0
Metabolism	Glycan biosynthesis and metabolism	Glycosaminoglycan degradation	ko00531		MS|comp162863_c0,MS|comp162769_c1,MS|comp162697_c0,MS|comp164528_c0,MS|comp166003_c0,MS|comp160638_c0,MS|comp165218_c0,MS|comp161445_c0,MS|comp164105_c0,MS|comp151937_c0,MS|comp897702_c0,MS|comp157090_c0,MS|comp164105_c1,MS|comp159595_c0,MS|comp162769_c0,MS|comp165193_c0,MS|comp889335_c0,MS|comp154394_c0,MS|comp163502_c0,MS|comp80654_c0,MS|comp164974_c0
Metabolism	Glycan biosynthesis and metabolism	Glycosphingolipid biosynthesis - ganglio series	ko00604		MS|comp162863_c0,MS|comp166003_c0,MS|comp165598_c0,MS|comp80654_c0,MS|comp151937_c0,MS|comp897702_c0,MS|comp157090_c0,MS|comp160638_c0,MS|comp165218_c0,MS|comp161445_c0
Metabolism	Glycan biosynthesis and metabolism	Glycosphingolipid biosynthesis - globo series	ko00603		MS|comp165218_c0,MS|comp160638_c0,MS|comp897702_c0,MS|comp157090_c0,MS|comp1991566_c0,MS|comp80654_c0,MS|comp151937_c0,MS|comp160043_c0,MS|comp160191_c0,MS|comp166003_c0,MS|comp162863_c0,MS|comp121288_c0
Metabolism	Glycan biosynthesis and metabolism	Glycosphingolipid biosynthesis - lacto and neolacto series	ko00601		MS|comp39075_c0,MS|comp144961_c0,MS|comp165920_c0
Metabolism	Glycan biosynthesis and metabolism	Glycosylphosphatidylinositol(GPI)-anchor biosynthesis	ko00563		MS|comp166145_c0,MS|comp105816_c1,MS|comp165043_c0,MS|comp164161_c2,MS|comp164804_c0,MS|comp920479_c0,MS|comp161628_c0,MS|comp162451_c0,MS|comp156530_c0,MS|comp105816_c0,MS|comp164161_c1,MS|comp162499_c0,MS|comp161415_c0,MS|comp146391_c0,MS|comp521251_c0,MS|comp682150_c0,MS|comp161829_c1,MS|comp165334_c0,MS|comp150374_c0,MS|comp159864_c1,MS|comp150340_c0,MS|comp148119_c0
Metabolism	Glycan biosynthesis and metabolism	Lipopolysaccharide biosynthesis	ko00540		MS|comp1871687_c0,MS|comp1124782_c0,MS|comp1606486_c0,MS|comp2532612_c0,MS|comp753324_c0,MS|comp1125773_c0,MS|comp79080_c0
Metabolism	Glycan biosynthesis and metabolism	Mucin type O-glycan biosynthesis	ko00512		MS|comp151248_c0,MS|comp165431_c1,MS|comp157089_c0,MS|comp165344_c0,MS|comp149967_c0,MS|comp162133_c0,MS|comp163371_c0,MS|comp165590_c0,MS|comp131117_c0,MS|comp151236_c0,MS|comp2435250_c0,MS|comp76291_c0,MS|comp150126_c0
Metabolism	Glycan biosynthesis and metabolism	N-Glycan biosynthesis	ko00510		MS|comp163783_c0,MS|comp393653_c0,MS|comp157117_c0,MS|comp160939_c0,MS|comp155750_c0,MS|comp160908_c0,MS|comp162552_c0,MS|comp141951_c0,MS|comp162959_c0,MS|comp158094_c0,MS|comp158012_c0,MS|comp159262_c0,MS|comp162450_c0,MS|comp163827_c0,MS|comp165813_c0,MS|comp1240302_c0,MS|comp156341_c0,MS|comp159989_c0,MS|comp166504_c1,MS|comp161729_c1,MS|comp163874_c0,MS|comp15275_c0,MS|comp166272_c1,MS|comp1…
Metabolism	Glycan biosynthesis and metabolism	Other glycan degradation	ko00511		MS|comp163897_c4,MS|comp166396_c0,MS|comp166140_c1,MS|comp156623_c0,MS|comp73317_c0,MS|comp163160_c0,MS|comp80654_c0,MS|comp158551_c0,MS|comp164196_c3,MS|comp150834_c0,MS|comp965774_c0,MS|comp158143_c0,MS|comp165236_c2,MS|comp155902_c0,MS|comp160638_c0,MS|comp165218_c0,MS|comp161445_c0,MS|comp164196_c0,MS|comp157090_c0,MS|comp897702_c0,MS|comp151937_c0,MS|comp162863_c0,MS|comp165236_c1,MS|comp166…
Metabolism	Glycan biosynthesis and metabolism	Other types of O-glycan biosynthesis	ko00514		MS|comp311826_c0,MS|comp1018125_c0,MS|comp2267921_c0,MS|comp150580_c0,MS|comp166580_c0,MS|comp155948_c0,MS|comp560251_c0,MS|comp165920_c0,MS|comp163937_c0,MS|comp159031_c0,MS|comp160946_c0,MS|comp151708_c0,MS|comp160541_c0,MS|comp144961_c0,MS|comp163429_c0,MS|comp129986_c0,MS|comp132860_c0,MS|comp166375_c0,MS|comp161215_c0,MS|comp393653_c0,MS|comp42374_c0
Metabolism	Glycan biosynthesis and metabolism	Peptidoglycan biosynthesis	ko00550		MS|comp549176_c0,MS|comp817564_c0,MS|comp1558234_c0,MS|comp735198_c0,MS|comp2709773_c0,MS|comp851396_c0,MS|comp1665499_c0,MS|comp909787_c0,MS|comp2481004_c0,MS|comp1626552_c0,MS|comp1155792_c0,MS|comp930854_c0,MS|comp2472848_c0,MS|comp12134_c0,MS|comp820301_c0,MS|comp1164327_c0,MS|comp1168510_c0
Metabolism	Glycan biosynthesis and metabolism	Various types of N-glycan biosynthesis	ko00513		MS|comp161729_c1,MS|comp163874_c0,MS|comp162813_c0,MS|comp15275_c0,MS|comp155902_c0,MS|comp156341_c0,MS|comp166504_c0,MS|comp159989_c0,MS|comp164279_c1,MS|comp166504_c1,MS|comp166170_c0,MS|comp157860_c0,MS|comp161729_c0,MS|comp158143_c0,MS|comp162450_c0,MS|comp2388020_c0,MS|comp158012_c0,MS|comp134002_c0,MS|comp159262_c0,MS|comp165813_c0,MS|comp165920_c0,MS|comp164558_c0,MS|comp165676_c0,MS|comp1…
Metabolism	Lipid metabolism	Arachidonic acid metabolism	ko00590		MS|comp158050_c0,MS|comp164566_c0,MS|comp150326_c0,MS|comp2377284_c0,MS|comp162840_c0,MS|comp120617_c0,MS|comp116114_c0,MS|comp146472_c0,MS|comp160566_c0,MS|comp124669_c0,MS|comp53783_c0,MS|comp163970_c0,MS|comp165403_c1,MS|comp84480_c0,MS|comp64974_c0,MS|comp165403_c0,MS|comp163583_c0,MS|comp160628_c0,MS|comp152821_c0,MS|comp157691_c0,MS|comp150376_c0,MS|comp164407_c0,MS|comp111120_c0,MS|comp156…
Metabolism	Lipid metabolism	Biosynthesis of unsaturated fatty acids	ko01040		MS|comp161198_c0,MS|comp120913_c0,MS|comp164701_c1,MS|comp38996_c0,MS|comp164526_c0,MS|comp165900_c0,MS|comp1598867_c0,MS|comp159454_c0,MS|comp80802_c0,MS|comp27281_c0,MS|comp166014_c0,MS|comp411790_c0,MS|comp1793526_c0,MS|comp151354_c0,MS|comp120159_c0,MS|comp153408_c0,MS|comp139140_c0,MS|comp425578_c0,MS|comp161429_c0,MS|comp164634_c0,MS|comp957788_c0,MS|comp156845_c0,MS|comp1561671_c0,MS|comp1…
Metabolism	Lipid metabolism	Cutin, suberine and wax biosynthesis	ko00073		MS|comp162562_c0,MS|comp143803_c0,MS|comp159822_c0,MS|comp1095842_c0,MS|comp1014031_c0,MS|comp163578_c1,MS|comp161568_c0,MS|comp161608_c2,MS|comp156836_c0,MS|comp646538_c0,MS|comp72646_c0,MS|comp162562_c1,MS|comp163953_c0,MS|comp106110_c0,MS|comp162380_c0,MS|comp1143248_c0,MS|comp161608_c1,MS|comp17138_c0,MS|comp640968_c0,MS|comp19167_c0,MS|comp165898_c0,MS|comp119247_c0,MS|comp43841_c0,MS|comp14…
Metabolism	Lipid metabolism	Ether lipid metabolism	ko00565		MS|comp163970_c0,MS|comp165452_c0,MS|comp99422_c0,MS|comp159731_c0,MS|comp156616_c0,MS|comp161138_c0,MS|comp650749_c0,MS|comp116114_c0,MS|comp120617_c0,MS|comp163680_c1,MS|comp146472_c0,MS|comp158050_c0,MS|comp158202_c0,MS|comp154932_c0,MS|comp150376_c0,MS|comp159413_c0,MS|comp164985_c1,MS|comp164303_c0,MS|comp163583_c0,MS|comp166639_c0,MS|comp161990_c0,MS|comp153329_c0
Metabolism	Lipid metabolism	Fatty acid biosynthesis	ko00061		MS|comp152920_c0,MS|comp2619781_c0,MS|comp1647665_c0,MS|comp926871_c0,MS|comp164967_c0,MS|comp957788_c0,MS|comp153908_c0,MS|comp1357577_c0,MS|comp165888_c1,MS|comp2316011_c0,MS|comp165888_c0,MS|comp166533_c0,MS|comp69599_c0,MS|comp163925_c0,MS|comp1581501_c0,MS|comp124623_c0,MS|comp2468918_c0,MS|comp166550_c0,MS|comp655045_c0,MS|comp411790_c0,MS|comp1605622_c0,MS|comp120159_c0,MS|comp139140_c0,MS…
Metabolism	Lipid metabolism	Fatty acid degradation	ko00071		MS|comp830885_c0,MS|comp1184354_c0,MS|comp2229937_c0,MS|comp641107_c0,MS|comp50442_c0,MS|comp1595227_c0,MS|comp164343_c0,MS|comp149814_c0,MS|comp155932_c0,MS|comp164071_c1,MS|comp2227603_c0,MS|comp153976_c0,MS|comp121996_c0,MS|comp1337182_c0,MS|comp1561671_c0,MS|comp85535_c0,MS|comp151066_c0,MS|comp3017937_c0,MS|comp1793526_c0,MS|comp166014_c0,MS|comp165331_c0,MS|comp153189_c0,MS|comp163927_c0,MS…
Metabolism	Lipid metabolism	Fatty acid elongation	ko00062		MS|comp162544_c0,MS|comp164796_c0,MS|comp153189_c0,MS|comp162019_c1,MS|comp164965_c0,MS|comp166014_c0,MS|comp157722_c0,MS|comp165465_c3,MS|comp154654_c0,MS|comp80802_c0,MS|comp1791216_c0,MS|comp2229937_c0,MS|comp155252_c0,MS|comp159890_c0,MS|comp160186_c0,MS|comp124814_c1,MS|comp160049_c0,MS|comp159454_c0,MS|comp156667_c0,MS|comp133913_c1,MS|comp161609_c0,MS|comp142670_c0,MS|comp164701_c1,MS|comp…
Metabolism	Lipid metabolism	Glycerolipid metabolism	ko00561		MS|comp155854_c0,MS|comp117534_c0,MS|comp155133_c0,MS|comp1958151_c0,MS|comp50442_c0,MS|comp153329_c0,MS|comp161312_c0,MS|comp157022_c2,MS|comp164388_c2,MS|comp132681_c0,MS|comp147109_c0,MS|comp130911_c0,MS|comp152996_c0,MS|comp2227603_c0,MS|comp164700_c1,MS|comp151066_c0,MS|comp163933_c0,MS|comp163320_c0,MS|comp156616_c0,MS|comp907222_c0,MS|comp66922_c0,MS|comp161387_c1,MS|comp164221_c0,MS|comp1…
Metabolism	Lipid metabolism	Glycerophospholipid metabolism	ko00564		MS|comp164985_c1,MS|comp166232_c0,MS|comp165482_c0,MS|comp66922_c0,MS|comp1169215_c0,MS|comp164594_c1,MS|comp163045_c0,MS|comp160354_c0,MS|comp163121_c0,MS|comp162871_c0,MS|comp163412_c1,MS|comp116114_c0,MS|comp163008_c0,MS|comp166254_c0,MS|comp155670_c0,MS|comp153497_c0,MS|comp153329_c0,MS|comp157022_c2,MS|comp163493_c0,MS|comp117534_c0,MS|comp156616_c0,MS|comp29713_c0,MS|comp160510_c0,MS|comp16…
Metabolism	Lipid metabolism	Linoleic acid metabolism	ko00591		MS|comp154098_c0,MS|comp163970_c0,MS|comp772087_c0,MS|comp163644_c0,MS|comp141444_c1,MS|comp164407_c0,MS|comp150376_c0,MS|comp163583_c0,MS|comp146472_c0,MS|comp120617_c0,MS|comp125768_c0,MS|comp116114_c0,MS|comp2377284_c0,MS|comp158050_c0
Metabolism	Lipid metabolism	Primary bile acid biosynthesis	ko00120		MS|comp146707_c0,MS|comp165273_c0,MS|comp158089_c0,MS|comp165941_c0,MS|comp157828_c0
Metabolism	Lipid metabolism	Sphingolipid metabolism	ko00600		MS|comp163680_c1,MS|comp160191_c0,MS|comp129461_c0,MS|comp165663_c0,MS|comp163773_c0,MS|comp164202_c0,MS|comp73317_c0,MS|comp157295_c0,MS|comp164777_c0,MS|comp165011_c0,MS|comp156616_c0,MS|comp155708_c0,MS|comp1733622_c0,MS|comp165236_c1,MS|comp152600_c0,MS|comp153329_c0,MS|comp158190_c0,MS|comp1200871_c0,MS|comp165025_c0,MS|comp165387_c0,MS|comp161445_c0,MS|comp50561_c0,MS|comp165236_c2,MS|comp1…
Metabolism	Lipid metabolism	Steroid biosynthesis	ko00100		MS|comp162579_c0,MS|comp2476901_c0,MS|comp94228_c0,MS|comp159825_c0,MS|comp161902_c0,MS|comp1079155_c0,MS|comp1979731_c0,MS|comp144281_c0,MS|comp164145_c1,MS|comp1064410_c0,MS|comp2520970_c0,MS|comp155683_c0
Metabolism	Lipid metabolism	Steroid hormone biosynthesis	ko00140		MS|comp159887_c0,MS|comp154098_c0,MS|comp361090_c0,MS|comp141444_c1,MS|comp164407_c0,MS|comp146707_c0,MS|comp163468_c0,MS|comp103265_c0,MS|comp157794_c0,MS|comp163345_c0,MS|comp160520_c0,MS|comp158722_c0,MS|comp46599_c0,MS|comp1200871_c0,MS|comp165671_c1,MS|comp163644_c0,MS|comp157828_c0,MS|comp161368_c0,MS|comp162189_c0,MS|comp149212_c0,MS|comp161391_c0,MS|comp162891_c0,MS|comp125768_c0,MS|comp1…
Metabolism	Lipid metabolism	Synthesis and degradation of ketone bodies	ko00072		MS|comp818013_c0,MS|comp1612930_c0,MS|comp158448_c0,MS|comp159150_c1,MS|comp1176235_c0,MS|comp156644_c0,MS|comp1184354_c0,MS|comp159150_c0,MS|comp1179595_c0,MS|comp4773_c0,MS|comp164918_c0,MS|comp163722_c0,MS|comp4468_c0,MS|comp1689044_c0
Metabolism	Lipid metabolism	alpha-Linolenic acid metabolism	ko00592		MS|comp153408_c0,MS|comp1206207_c0,MS|comp150376_c0,MS|comp555440_c0,MS|comp54476_c0,MS|comp160779_c0,MS|comp2504129_c0,MS|comp163583_c0,MS|comp27281_c0,MS|comp13769_c0,MS|comp1541681_c0,MS|comp164526_c0,MS|comp149814_c0,MS|comp163970_c0,MS|comp164343_c0,MS|comp97003_c0,MS|comp155932_c0,MS|comp165900_c0,MS|comp155245_c0,MS|comp161198_c0,MS|comp156845_c0,MS|comp158050_c0,MS|comp1561671_c0,MS|comp1…
Metabolism	Metabolism of cofactors and vitamins	Biotin metabolism	ko00780		MS|comp1647665_c0,MS|comp1138967_c0,MS|comp1649149_c0,MS|comp164967_c0,MS|comp957788_c0,MS|comp1357577_c0,MS|comp955873_c0,MS|comp1162497_c0,MS|comp139142_c0,MS|comp164677_c0,MS|comp69599_c0,MS|comp1212744_c0,MS|comp132689_c0,MS|comp154896_c0,MS|comp2470650_c0,MS|comp655045_c0,MS|comp411790_c0,MS|comp1151494_c0,MS|comp2632969_c0,MS|comp120159_c0,MS|comp1605622_c0,MS|comp139140_c0
Metabolism	Metabolism of cofactors and vitamins	Folate biosynthesis	ko00790		MS|comp151823_c0,MS|comp162262_c0,MS|comp830811_c0,MS|comp2555202_c0,MS|comp1574733_c0,MS|comp156111_c0,MS|comp164377_c0,MS|comp162962_c0,MS|comp1267358_c0,MS|comp2591615_c0,MS|comp443203_c0,MS|comp154978_c0,MS|comp636395_c0,MS|comp900962_c0,MS|comp165897_c0,MS|comp1659444_c0,MS|comp548294_c0,MS|comp166440_c0,MS|comp160204_c0,MS|comp1680062_c0,MS|comp162353_c0,MS|comp162829_c0,MS|comp2859552_c0,M…
Metabolism	Metabolism of cofactors and vitamins	Lipoic acid metabolism	ko00785		MS|comp1986145_c0,MS|comp1681611_c0,MS|comp76517_c0,MS|comp162925_c0,MS|comp2743949_c0,MS|comp164208_c1,MS|comp164208_c0,MS|comp155450_c0
Metabolism	Metabolism of cofactors and vitamins	Nicotinate and nicotinamide metabolism	ko00760		MS|comp158059_c1,MS|comp156650_c0,MS|comp1327414_c0,MS|comp1188905_c0,MS|comp123459_c0,MS|comp1612237_c0,MS|comp161111_c0,MS|comp165467_c0,MS|comp158059_c0,MS|comp765953_c0,MS|comp2004153_c0,MS|comp163524_c0,MS|comp164767_c0,MS|comp916368_c0,MS|comp163980_c0,MS|comp1294771_c0,MS|comp143993_c0,MS|comp139932_c0,MS|comp19961_c0,MS|comp163971_c0,MS|comp1963189_c0,MS|comp164767_c1,MS|comp164038_c0,MS|…
Metabolism	Metabolism of cofactors and vitamins	One carbon pool by folate	ko00670		MS|comp1306139_c0,MS|comp948121_c0,MS|comp162260_c0,MS|comp133890_c0,MS|comp12544_c0,MS|comp157481_c0,MS|comp163984_c0,MS|comp162525_c0,MS|comp166532_c1,MS|comp1394152_c0,MS|comp2457936_c0,MS|comp2338657_c0,MS|comp1571337_c0,MS|comp156867_c0,MS|comp920461_c0,MS|comp165191_c0,MS|comp2373931_c0,MS|comp147579_c0,MS|comp844843_c0,MS|comp2320139_c0,MS|comp2573319_c0,MS|comp166357_c0,MS|comp160589_c1,M…
Metabolism	Metabolism of cofactors and vitamins	Pantothenate and CoA biosynthesis	ko00770		MS|comp451683_c0,MS|comp39690_c0,MS|comp166030_c1,MS|comp1057106_c0,MS|comp155971_c0,MS|comp1608417_c0,MS|comp149706_c0,MS|comp2255871_c0,MS|comp162636_c0,MS|comp1371334_c0,MS|comp1215641_c0,MS|comp501357_c0,MS|comp2197_c0,MS|comp1268828_c0,MS|comp158101_c0,MS|comp153052_c0,MS|comp166030_c0,MS|comp147357_c0,MS|comp166625_c2,MS|comp160128_c0,MS|comp1538192_c0,MS|comp1705109_c0,MS|comp2300615_c0,MS…
Metabolism	Metabolism of cofactors and vitamins	Porphyrin and chlorophyll metabolism	ko00860		MS|comp162301_c4,MS|comp163468_c0,MS|comp162275_c0,MS|comp92162_c0,MS|comp1379904_c0,MS|comp161889_c0,MS|comp1560134_c0,MS|comp2089642_c0,MS|comp149052_c0,MS|comp46599_c0,MS|comp906677_c0,MS|comp2387334_c0,MS|comp650544_c0,MS|comp2277536_c0,MS|comp43546_c0,MS|comp1944890_c0,MS|comp29029_c0,MS|comp2619633_c0,MS|comp116788_c0,MS|comp164974_c0,MS|comp164531_c0,MS|comp2409514_c0,MS|comp163558_c0,MS|c…
Metabolism	Metabolism of cofactors and vitamins	Retinol metabolism	ko00830		MS|comp163644_c0,MS|comp163663_c0,MS|comp162189_c0,MS|comp149212_c0,MS|comp152263_c0,MS|comp1427208_c0,MS|comp125768_c0,MS|comp2377284_c0,MS|comp1678388_c0,MS|comp154098_c0,MS|comp141444_c1,MS|comp164407_c0,MS|comp163468_c0,MS|comp1739692_c0,MS|comp161219_c0,MS|comp46599_c0,MS|comp165646_c1,MS|comp163663_c1,MS|comp163857_c2,MS|comp163912_c0,MS|comp161391_c0,MS|comp162891_c0,MS|comp146556_c0,MS|co…
Metabolism	Metabolism of cofactors and vitamins	Riboflavin metabolism	ko00740		MS|comp163390_c0,MS|comp154702_c0,MS|comp163858_c0,MS|comp2471240_c0,MS|comp160575_c0,MS|comp147484_c0,MS|comp162301_c4
Metabolism	Metabolism of cofactors and vitamins	Thiamine metabolism	ko00730		MS|comp160045_c1,MS|comp2786082_c0,MS|comp761153_c0,MS|comp2335230_c0,MS|comp165336_c0,MS|comp149476_c0
Metabolism	Metabolism of cofactors and vitamins	Ubiquinone and other terpenoid-quinone biosynthesis	ko00130		MS|comp156864_c0,MS|comp2431975_c0,MS|comp162963_c0,MS|comp678833_c0,MS|comp100317_c0,MS|comp162114_c0,MS|comp2676758_c0,MS|comp426503_c0,MS|comp166171_c1,MS|comp1210419_c0,MS|comp552749_c0,MS|comp2589433_c0,MS|comp158286_c0,MS|comp2702276_c0,MS|comp156606_c0,MS|comp160944_c0,MS|comp165697_c0,MS|comp159325_c0,MS|comp166171_c0,MS|comp1227563_c0,MS|comp4694_c0,MS|comp2378412_c0,MS|comp1864604_c0,MS…
Metabolism	Metabolism of cofactors and vitamins	Vitamin B6 metabolism	ko00750		MS|comp529889_c0,MS|comp1193319_c0,MS|comp166028_c0,MS|comp2640570_c0,MS|comp161951_c0,MS|comp740163_c0,MS|comp2041580_c0,MS|comp1000684_c0,MS|comp161087_c0
Metabolism	Metabolism of other amino acids	Cyanoamino acid metabolism	ko00460		MS|comp165403_c1,MS|comp156068_c0,MS|comp2573319_c0,MS|comp86882_c0,MS|comp957060_c0,MS|comp165403_c0,MS|comp164115_c0,MS|comp163709_c0,MS|comp4024442_c0
Metabolism	Metabolism of other amino acids	D-Glutamine and D-glutamate metabolism	ko00471		MS|comp163262_c2,MS|comp102210_c0,MS|comp909787_c0,MS|comp2610837_c0,MS|comp817564_c0,MS|comp164291_c0,MS|comp2908754_c0,MS|comp2514279_c0
Metabolism	Metabolism of other amino acids	Glutathione metabolism	ko00480		MS|comp165455_c0,MS|comp154473_c0,MS|comp160471_c0,MS|comp1784681_c0,MS|comp149749_c0,MS|comp165423_c0,MS|comp157483_c1,MS|comp57136_c0,MS|comp156242_c0,MS|comp164514_c0,MS|comp164780_c0,MS|comp161162_c0,MS|comp736041_c0,MS|comp165403_c0,MS|comp166629_c0,MS|comp149827_c0,MS|comp158854_c0,MS|comp124718_c0,MS|comp78524_c0,MS|comp159147_c0,MS|comp141207_c0,MS|comp2645760_c0,MS|comp57221_c0,MS|comp15…
Metabolism	Metabolism of other amino acids	Phosphonate and phosphinate metabolism	ko00440		MS|comp164920_c1,MS|comp149254_c0,MS|comp161569_c0,MS|comp157001_c0,MS|comp154932_c0,MS|comp166639_c0,MS|comp2592948_c0,MS|comp157600_c0,MS|comp158202_c0,MS|comp161138_c0,MS|comp163231_c0,MS|comp164594_c1
Metabolism	Metabolism of other amino acids	Selenocompound metabolism	ko00450		MS|comp152234_c0,MS|comp1097707_c0,MS|comp88297_c0,MS|comp164399_c0,MS|comp324093_c0,MS|comp163430_c0,MS|comp1565027_c0,MS|comp1524397_c0,MS|comp1622905_c0,MS|comp1725066_c0,MS|comp40096_c0,MS|comp12544_c0,MS|comp842727_c0,MS|comp156887_c0,MS|comp741333_c0,MS|comp948121_c0,MS|comp2661058_c0,MS|comp569572_c0,MS|comp607593_c0,MS|comp1066550_c0,MS|comp640837_c0,MS|comp156753_c1,MS|comp1571690_c0,MS|…
Metabolism	Metabolism of other amino acids	Taurine and hypotaurine metabolism	ko00430		MS|comp158453_c0,MS|comp148810_c0,MS|comp1881020_c0,MS|comp166547_c0,MS|comp163709_c0,MS|comp165403_c0,MS|comp165281_c0,MS|comp2517931_c0,MS|comp160330_c0,MS|comp107526_c0,MS|comp165403_c1
Metabolism	Metabolism of other amino acids	beta-Alanine metabolism	ko00410		MS|comp166030_c1,MS|comp165281_c0,MS|comp2517931_c0,MS|comp2479600_c0,MS|comp2227603_c0,MS|comp161387_c0,MS|comp151066_c0,MS|comp150787_c1,MS|comp158117_c1,MS|comp149706_c0,MS|comp121996_c0,MS|comp150787_c0,MS|comp2404094_c0,MS|comp166547_c0,MS|comp451683_c0,MS|comp160501_c0,MS|comp120180_c0,MS|comp160330_c0,MS|comp162859_c0,MS|comp166030_c0,MS|comp1864873_c0,MS|comp1595227_c0,MS|comp50442_c0,MS|…
Metabolism	Metabolism of terpenoids and polyketides	Biosynthesis of ansamycins	ko01051		MS|comp161803_c1,MS|comp161803_c0,MS|comp2339068_c0,MS|comp1153806_c0,MS|comp1386809_c0,MS|comp83803_c0
Metabolism	Metabolism of terpenoids and polyketides	Biosynthesis of siderophore group nonribosomal peptides	ko01053		MS|comp299753_c0,MS|comp2702276_c0,MS|comp2335420_c0
Metabolism	Metabolism of terpenoids and polyketides	Geraniol degradation	ko00281		MS|comp1541681_c0,MS|comp2381151_c0,MS|comp164965_c0,MS|comp1793526_c0,MS|comp1595227_c0,MS|comp1521041_c0,MS|comp641107_c0,MS|comp156644_c0,MS|comp2504129_c0,MS|comp1196717_c0,MS|comp1694115_c0,MS|comp930326_c0,MS|comp1648300_c0,MS|comp1612930_c0
Metabolism	Metabolism of terpenoids and polyketides	Insect hormone biosynthesis	ko00981		MS|comp159365_c0,MS|comp159798_c0,MS|comp1966321_c0,MS|comp165882_c0,MS|comp161782_c1,MS|comp84959_c0,MS|comp161782_c0,MS|comp165882_c1,MS|comp161895_c0,MS|comp164064_c0,MS|comp830822_c0
Metabolism	Metabolism of terpenoids and polyketides	Limonene and pinene degradation	ko00903		MS|comp1531871_c0,MS|comp161387_c0,MS|comp1295808_c0,MS|comp150787_c1,MS|comp158117_c1,MS|comp151066_c0,MS|comp116792_c0,MS|comp162861_c0,MS|comp40035_c0,MS|comp551913_c0,MS|comp1579266_c0,MS|comp150787_c0,MS|comp163097_c0,MS|comp1648300_c0,MS|comp10650_c0,MS|comp161387_c1,MS|comp1521041_c0,MS|comp641107_c0,MS|comp1595227_c0,MS|comp50442_c0,MS|comp159426_c0,MS|comp1793526_c0
Metabolism	Metabolism of terpenoids and polyketides	Nonribosomal peptide structures	ko01054		MS|comp1578262_c0
Metabolism	Metabolism of terpenoids and polyketides	Polyketide sugar unit biosynthesis	ko00523		MS|comp1635486_c0
Metabolism	Metabolism of terpenoids and polyketides	Sesquiterpenoid and triterpenoid biosynthesis	ko00909		MS|comp2476901_c0
Metabolism	Metabolism of terpenoids and polyketides	Terpenoid backbone biosynthesis	ko00900		MS|comp836730_c0,MS|comp162292_c0,MS|comp761153_c0,MS|comp939010_c0,MS|comp2638312_c0,MS|comp162707_c1,MS|comp163500_c0,MS|comp163500_c1,MS|comp2426229_c0,MS|comp1184354_c0,MS|comp159705_c0,MS|comp154899_c0,MS|comp157969_c0,MS|comp160092_c0,MS|comp154651_c0,MS|comp139692_c0,MS|comp161765_c0,MS|comp144464_c0,MS|comp164254_c0,MS|comp1179595_c0,MS|comp163458_c0,MS|comp160468_c0,MS|comp154692_c0,MS|c…
Metabolism	Metabolism of terpenoids and polyketides	Tetracycline biosynthesis	ko00253		MS|comp2468918_c0
Metabolism	Metabolism of terpenoids and polyketides	Zeatin biosynthesis	ko00908		MS|comp497574_c0,MS|comp641556_c0,MS|comp157651_c0
Metabolism	Overview	2-Oxocarboxylic acid metabolism	ko01210		MS|comp111544_c0,MS|comp2645760_c0,MS|comp411642_c0,MS|comp2300615_c0,MS|comp547975_c0,MS|comp1352840_c0,MS|comp1550363_c0,MS|comp540225_c0,MS|comp1923204_c0,MS|comp1571987_c0,MS|comp163913_c0,MS|comp81511_c0,MS|comp1052198_c0,MS|comp861680_c0,MS|comp2226154_c0,MS|comp1624635_c0,MS|comp1194624_c0,MS|comp160815_c2,MS|comp155512_c0,MS|comp1658211_c0,MS|comp2850131_c0,MS|comp166410_c1,MS|comp469930_…
Metabolism	Overview	Degradation of aromatic compounds	ko01220		MS|comp467675_c0,MS|comp1739692_c0,MS|comp1714372_c0,MS|comp840515_c0,MS|comp161312_c0,MS|comp163448_c0,MS|comp161976_c0,MS|comp1532908_c0,MS|comp163054_c0,MS|comp1427208_c0,MS|comp153976_c0,MS|comp1678388_c0,MS|comp112897_c0,MS|comp154553_c0,MS|comp85535_c0,MS|comp160339_c2,MS|comp156516_c0,MS|comp157551_c0,MS|comp1012173_c0,MS|comp160712_c1
Metabolism	Overview	Fatty acid metabolism	ko01212		MS|comp124814_c1,MS|comp166533_c0,MS|comp164071_c1,MS|comp149814_c0,MS|comp164343_c0,MS|comp121235_c0,MS|comp156667_c0,MS|comp155932_c0,MS|comp1357577_c0,MS|comp957788_c0,MS|comp121996_c0,MS|comp164967_c0,MS|comp3017937_c0,MS|comp1561671_c0,MS|comp926871_c0,MS|comp2619781_c0,MS|comp164634_c0,MS|comp160344_c0,MS|comp152920_c0,MS|comp160361_c0,MS|comp1184354_c0,MS|comp830885_c0,MS|comp1595227_c0,MS…
Metabolism	Xenobiotics biodegradation and metabolism	1,1,1-Trichloro-2,2-bis(4-chlorophenyl)ethane (DDT) degradation	ko00351		MS|comp1035505_c0,MS|comp1354869_c0,MS|comp2235213_c0
Metabolism	Xenobiotics biodegradation and metabolism	Aminobenzoate degradation	ko00627		MS|comp166144_c0,MS|comp162335_c0,MS|comp50397_c0,MS|comp1012472_c0,MS|comp166440_c0,MS|comp1295808_c0,MS|comp155244_c0,MS|comp160204_c0,MS|comp551913_c0,MS|comp1180896_c0,MS|comp153189_c0,MS|comp2591615_c0,MS|comp1079296_c0,MS|comp1569972_c0,MS|comp166014_c0,MS|comp471756_c0,MS|comp163097_c0,MS|comp1648300_c0,MS|comp10650_c0,MS|comp164377_c0,MS|comp1521041_c0,MS|comp1595227_c0,MS|comp159426_c0
Metabolism	Xenobiotics biodegradation and metabolism	Atrazine degradation	ko00791		MS|comp1590081_c0
Metabolism	Xenobiotics biodegradation and metabolism	Benzoate degradation	ko00362		MS|comp1184354_c0,MS|comp166014_c0,MS|comp159150_c0,MS|comp153189_c0,MS|comp4773_c0,MS|comp164796_c0,MS|comp1689044_c0,MS|comp1206207_c0,MS|comp1532908_c0,MS|comp10650_c0,MS|comp2229937_c0,MS|comp1648300_c0,MS|comp163097_c0,MS|comp27281_c0,MS|comp1176235_c0,MS|comp1595227_c0,MS|comp1521041_c0,MS|comp2504129_c0,MS|comp161609_c0,MS|comp1016067_c0,MS|comp1179595_c0,MS|comp1541681_c0,MS|comp1429148_c…
Metabolism	Xenobiotics biodegradation and metabolism	Bisphenol degradation	ko00363		MS|comp1295808_c0,MS|comp1175335_c0,MS|comp159426_c0,MS|comp157511_c0,MS|comp2235213_c0,MS|comp1354869_c0,MS|comp76656_c0,MS|comp1035505_c0,MS|comp1180743_c0
Metabolism	Xenobiotics biodegradation and metabolism	Caprolactam degradation	ko00930		MS|comp927591_c0,MS|comp154553_c0,MS|comp112897_c0,MS|comp156516_c0,MS|comp157551_c0,MS|comp160339_c2,MS|comp160712_c1,MS|comp1648300_c0,MS|comp161312_c0,MS|comp1521041_c0,MS|comp641107_c0,MS|comp1595227_c0,MS|comp153189_c0,MS|comp1793526_c0,MS|comp164965_c0,MS|comp163448_c0,MS|comp166014_c0,MS|comp163054_c0
Metabolism	Xenobiotics biodegradation and metabolism	Chloroalkane and chloroalkene degradation	ko00625		MS|comp467675_c0,MS|comp1739692_c0,MS|comp1714372_c0,MS|comp840515_c0,MS|comp50442_c0,MS|comp161387_c1,MS|comp161976_c0,MS|comp2548337_c0,MS|comp161387_c0,MS|comp1427208_c0,MS|comp1531871_c0,MS|comp153976_c0,MS|comp40035_c0,MS|comp1678388_c0,MS|comp1579266_c0,MS|comp158117_c1,MS|comp150787_c1,MS|comp116792_c0,MS|comp151066_c0,MS|comp85535_c0,MS|comp162861_c0,MS|comp150787_c0
Metabolism	Xenobiotics biodegradation and metabolism	Chlorocyclohexane and chlorobenzene degradation	ko00361		MS|comp2548337_c0,MS|comp2451662_c0
Metabolism	Xenobiotics biodegradation and metabolism	Dioxin degradation	ko00621		MS|comp1532908_c0
Metabolism	Xenobiotics biodegradation and metabolism	Drug metabolism - cytochrome P450	ko00982		MS|comp165671_c1,MS|comp840515_c0,MS|comp149589_c0,MS|comp156242_c0,MS|comp160520_c0,MS|comp152622_c0,MS|comp163345_c0,MS|comp149827_c0,MS|comp156952_c0,MS|comp124718_c0,MS|comp103265_c0,MS|comp157794_c0,MS|comp361090_c0,MS|comp15_c0,MS|comp159147_c0,MS|comp159887_c0,MS|comp161976_c0,MS|comp112064_c0,MS|comp110831_c0,MS|comp85535_c0,MS|comp87779_c0,MS|comp165126_c0,MS|comp161391_c0,MS|comp160471_…
Metabolism	Xenobiotics biodegradation and metabolism	Drug metabolism - other enzymes	ko00983		MS|comp160128_c0,MS|comp54240_c0,MS|comp162189_c0,MS|comp166625_c3,MS|comp162749_c0,MS|comp16015_c0,MS|comp162224_c0,MS|comp74599_c0,MS|comp163468_c0,MS|comp740810_c0,MS|comp1014588_c0,MS|comp160128_c1,MS|comp148819_c0,MS|comp155488_c0,MS|comp162905_c0,MS|comp154872_c0,MS|comp146556_c0,MS|comp149706_c0,MS|comp147616_c0,MS|comp151689_c0,MS|comp155262_c0,MS|comp932043_c0,MS|comp160857_c0,MS|comp157…
Metabolism	Xenobiotics biodegradation and metabolism	Ethylbenzene degradation	ko00642		MS|comp551913_c0,MS|comp1541681_c0,MS|comp2504129_c0,MS|comp10650_c0,MS|comp163097_c0
Metabolism	Xenobiotics biodegradation and metabolism	Fluorobenzoate degradation	ko00364		MS|comp2451662_c0
Metabolism	Xenobiotics biodegradation and metabolism	Metabolism of xenobiotics by cytochrome P450	ko00980		MS|comp161391_c0,MS|comp160471_c0,MS|comp153976_c0,MS|comp152333_c0,MS|comp146556_c0,MS|comp162891_c0,MS|comp165287_c0,MS|comp85535_c0,MS|comp87779_c0,MS|comp156952_c1,MS|comp157483_c1,MS|comp57136_c0,MS|comp158241_c0,MS|comp149749_c0,MS|comp160520_c0,MS|comp152821_c0,MS|comp163345_c0,MS|comp152622_c0,MS|comp165671_c1,MS|comp149589_c0,MS|comp840515_c0,MS|comp84480_c0,MS|comp156242_c0,MS|comp36109…
Metabolism	Xenobiotics biodegradation and metabolism	Naphthalene degradation	ko00626		MS|comp161976_c0,MS|comp1739692_c0,MS|comp467675_c0,MS|comp153976_c0,MS|comp1714372_c0,MS|comp1427208_c0,MS|comp840515_c0,MS|comp1678388_c0,MS|comp85535_c0
Metabolism	Xenobiotics biodegradation and metabolism	Nitrotoluene degradation	ko00633		MS|comp1560449_c0,MS|comp820544_c0
Metabolism	Xenobiotics biodegradation and metabolism	Polycyclic aromatic hydrocarbon degradation	ko00624		MS|comp1295808_c0,MS|comp159356_c0,MS|comp2703896_c0,MS|comp159426_c0,MS|comp1450623_c0
Metabolism	Xenobiotics biodegradation and metabolism	Styrene degradation	ko00643		MS|comp471756_c0,MS|comp158674_c0,MS|comp2636380_c0,MS|comp165831_c0,MS|comp161871_c1,MS|comp161871_c0,MS|comp165328_c0
Metabolism	Xenobiotics biodegradation and metabolism	Toluene degradation	ko00623		MS|comp2451662_c0
Metabolism	Xenobiotics biodegradation and metabolism	Xylene degradation	ko00622		MS|comp1532908_c0
Organismal Systems	Circulatory system	Adrenergic signaling in cardiomyocytes	ko04261		MS|comp165798_c1,MS|comp163130_c0,MS|comp155496_c0,MS|comp161398_c1,MS|comp164885_c0,MS|comp116364_c0,MS|comp166329_c0,MS|comp159717_c0,MS|comp160262_c0,MS|comp163262_c1,MS|comp164536_c0,MS|comp160898_c1,MS|comp115432_c0,MS|comp161407_c1,MS|comp163557_c2,MS|comp162383_c0,MS|comp142724_c0,MS|comp141389_c0,MS|comp73743_c0,MS|comp116507_c0,MS|comp166889_c1,MS|comp147693_c0,MS|comp368145_c0,MS|comp25…
Organismal Systems	Circulatory system	Cardiac muscle contraction	ko04260		MS|comp151928_c0,MS|comp160882_c0,MS|comp254128_c0,MS|comp166899_c0,MS|comp134370_c0,MS|comp162264_c0,MS|comp196895_c0,MS|comp789426_c0,MS|comp164162_c0,MS|comp399108_c0,MS|comp134137_c0,MS|comp134465_c0,MS|comp2519161_c0,MS|comp347913_c0,MS|comp596337_c0,MS|comp116372_c0,MS|comp163241_c1,MS|comp141411_c0,MS|comp159969_c0,MS|comp154775_c0,MS|comp2239923_c0,MS|comp938470_c0,MS|comp323476_c0,MS|com…
Organismal Systems	Circulatory system	Vascular smooth muscle contraction	ko04270		MS|comp155496_c0,MS|comp161398_c1,MS|comp66733_c0,MS|comp146472_c0,MS|comp159717_c0,MS|comp116364_c0,MS|comp166329_c0,MS|comp141479_c0,MS|comp163970_c0,MS|comp164536_c0,MS|comp164200_c0,MS|comp115432_c0,MS|comp163583_c0,MS|comp166628_c0,MS|comp162383_c0,MS|comp163557_c2,MS|comp166622_c0,MS|comp116507_c0,MS|comp73743_c0,MS|comp156915_c1,MS|comp154985_c0,MS|comp141389_c0,MS|comp142724_c0,MS|comp162…
Organismal Systems	Development	Axon guidance	ko04360		MS|comp160056_c0,MS|comp139227_c0,MS|comp143088_c0,MS|comp165680_c0,MS|comp160601_c0,MS|comp164662_c1,MS|comp149821_c0,MS|comp157733_c0,MS|comp165563_c0,MS|comp162614_c0,MS|comp161549_c0,MS|comp157493_c0,MS|comp147181_c0,MS|comp161549_c1,MS|comp319358_c0,MS|comp149821_c1,MS|comp147302_c0,MS|comp162806_c0,MS|comp155297_c0,MS|comp166542_c0,MS|comp147868_c0,MS|comp164153_c1,MS|comp738680_c0,MS|comp1…
Organismal Systems	Development	Dorso-ventral axis formation	ko04320		MS|comp155814_c0,MS|comp152470_c0,MS|comp157133_c0,MS|comp155633_c0,MS|comp143604_c0,MS|comp153343_c0,MS|comp157733_c0,MS|comp141855_c0,MS|comp162163_c0,MS|comp158243_c0,MS|comp162554_c0,MS|comp152165_c1,MS|comp156636_c0,MS|comp66069_c0,MS|comp115347_c0,MS|comp164233_c0,MS|comp164715_c0,MS|comp160162_c0,MS|comp166873_c1,MS|comp163171_c0,MS|comp159000_c1,MS|comp165316_c0,MS|comp140632_c0,MS|comp16…
Organismal Systems	Development	Osteoclast differentiation	ko04380		MS|comp164613_c0,MS|comp163130_c0,MS|comp147693_c0,MS|comp163939_c0,MS|comp163373_c1,MS|comp165562_c0,MS|comp164885_c0,MS|comp147429_c0,MS|comp160409_c0,MS|comp164057_c0,MS|comp152054_c0,MS|comp160262_c0,MS|comp163373_c0,MS|comp165316_c0,MS|comp55389_c0,MS|comp165227_c1,MS|comp161898_c0,MS|comp160162_c0,MS|comp162269_c0,MS|comp159455_c0,MS|comp153357_c0,MS|comp161257_c0,MS|comp157824_c0,MS|comp12…
Organismal Systems	Digestive system	Bile secretion	ko04976		MS|comp160998_c0,MS|comp157698_c0,MS|comp159969_c0,MS|comp146925_c0,MS|comp163241_c0,MS|comp57469_c0,MS|comp1026868_c0,MS|comp149693_c0,MS|comp3977193_c0,MS|comp1419865_c0,MS|comp165304_c0,MS|comp159081_c0,MS|comp150399_c0,MS|comp164939_c0,MS|comp437441_c0,MS|comp142535_c0,MS|comp156747_c0,MS|comp165618_c0,MS|comp163192_c0,MS|comp158848_c0,MS|comp163241_c1,MS|comp135596_c0,MS|comp701709_c0,MS|com…
Organismal Systems	Digestive system	Carbohydrate digestion and absorption	ko04973		MS|comp163262_c1,MS|comp161154_c0,MS|comp90921_c0,MS|comp1767530_c0,MS|comp162187_c0,MS|comp163262_c0,MS|comp163130_c0,MS|comp132993_c0,MS|comp161776_c0,MS|comp160262_c0,MS|comp1171892_c0,MS|comp145393_c0,MS|comp163241_c1,MS|comp162566_c1,MS|comp87038_c0,MS|comp164162_c0,MS|comp117478_c0,MS|comp4820_c0,MS|comp751047_c0,MS|comp123313_c0,MS|comp14853_c0,MS|comp164549_c0,MS|comp160882_c0,MS|comp1632…
Organismal Systems	Digestive system	Fat digestion and absorption	ko04975		MS|comp156496_c0,MS|comp43479_c0,MS|comp153490_c0,MS|comp150376_c0,MS|comp154948_c0,MS|comp164985_c1,MS|comp158848_c0,MS|comp1979731_c0,MS|comp155854_c0,MS|comp164388_c2,MS|comp165646_c1,MS|comp157022_c2,MS|comp153329_c0,MS|comp163038_c0,MS|comp780663_c0,MS|comp163970_c0,MS|comp153005_c0,MS|comp156616_c0,MS|comp166270_c0,MS|comp163320_c0,MS|comp120617_c0,MS|comp163680_c1,MS|comp116114_c0,MS|comp1…
Organismal Systems	Digestive system	Gastric acid secretion	ko04971		MS|comp142657_c0,MS|comp164162_c0,MS|comp60737_c0,MS|comp166756_c1,MS|comp603980_c0,MS|comp163241_c1,MS|comp162264_c0,MS|comp161652_c1,MS|comp152765_c0,MS|comp162648_c0,MS|comp160882_c0,MS|comp136875_c0,MS|comp836427_c0,MS|comp163601_c0,MS|comp159081_c0,MS|comp1576896_c0,MS|comp150399_c0,MS|comp157806_c0,MS|comp55313_c0,MS|comp166756_c0,MS|comp157863_c0,MS|comp2385162_c0,MS|comp132524_c0,MS|comp1…
Organismal Systems	Digestive system	Mineral absorption	ko04978		MS|comp153638_c0,MS|comp163979_c0,MS|comp163241_c0,MS|comp116788_c0,MS|comp159969_c0,MS|comp29029_c0,MS|comp163872_c0,MS|comp163262_c0,MS|comp157948_c0,MS|comp895202_c0,MS|comp166617_c0,MS|comp163370_c0,MS|comp1185531_c0,MS|comp160882_c0,MS|comp163370_c1,MS|comp162264_c0,MS|comp153012_c0,MS|comp156427_c0,MS|comp163241_c1,MS|comp164162_c0,MS|comp163262_c1
Organismal Systems	Digestive system	Pancreatic secretion	ko04972		MS|comp164536_c0,MS|comp163262_c1,MS|comp155120_c0,MS|comp160933_c0,MS|comp1979731_c0,MS|comp115432_c0,MS|comp163557_c2,MS|comp166628_c0,MS|comp163677_c0,MS|comp141389_c0,MS|comp142724_c0,MS|comp166889_c1,MS|comp116507_c0,MS|comp156496_c0,MS|comp73743_c0,MS|comp146472_c0,MS|comp153849_c0,MS|comp2979007_c0,MS|comp147429_c0,MS|comp141479_c0,MS|comp159717_c0,MS|comp163970_c0,MS|comp166377_c0,MS|comp…
Organismal Systems	Digestive system	Protein digestion and absorption	ko04974		MS|comp155414_c0,MS|comp159969_c0,MS|comp163241_c0,MS|comp166255_c0,MS|comp151688_c0,MS|comp165966_c0,MS|comp166331_c1,MS|comp164143_c0,MS|comp1321228_c0,MS|comp161997_c0,MS|comp524036_c0,MS|comp162372_c0,MS|comp165643_c0,MS|comp162264_c0,MS|comp164774_c0,MS|comp160882_c0,MS|comp2083022_c0,MS|comp164747_c1,MS|comp162675_c0,MS|comp159994_c0,MS|comp161814_c0,MS|comp164162_c0,MS|comp163241_c1,MS|com…
Organismal Systems	Digestive system	Salivary secretion	ko04970		MS|comp142724_c0,MS|comp141389_c0,MS|comp116507_c0,MS|comp140663_c0,MS|comp73743_c0,MS|comp163557_c2,MS|comp166628_c0,MS|comp115432_c0,MS|comp163262_c1,MS|comp164536_c0,MS|comp164200_c0,MS|comp166377_c0,MS|comp153849_c0,MS|comp116364_c0,MS|comp166329_c0,MS|comp159717_c0,MS|comp161398_c1,MS|comp155496_c0,MS|comp1576896_c0,MS|comp1942077_c0,MS|comp157806_c0,MS|comp160882_c0,MS|comp836427_c0,MS|comp…
Organismal Systems	Digestive system	Vitamin digestion and absorption	ko04977		MS|comp162926_c0,MS|comp166270_c0,MS|comp156496_c0,MS|comp153205_c0,MS|comp164388_c2,MS|comp166640_c1,MS|comp155303_c0,MS|comp163038_c0,MS|comp758117_c0,MS|comp158848_c0,MS|comp164677_c0,MS|comp164851_c0,MS|comp157683_c0,MS|comp504541_c0
Organismal Systems	Endocrine system	Adipocytokine signaling pathway	ko04920		MS|comp837260_c0,MS|comp158081_c0,MS|comp166700_c0,MS|comp159455_c0,MS|comp118501_c0,MS|comp150556_c0,MS|comp117608_c0,MS|comp701367_c0,MS|comp164459_c1,MS|comp152299_c0,MS|comp1539674_c0,MS|comp166136_c0,MS|comp160032_c0,MS|comp151151_c0,MS|comp151151_c1,MS|comp163192_c1,MS|comp164071_c1,MS|comp160409_c0,MS|comp145499_c0,MS|comp164360_c0,MS|comp154940_c0,MS|comp164692_c0,MS|comp137350_c0,MS|comp…
Organismal Systems	Endocrine system	Estrogen signaling pathway	ko04915		MS|comp603980_c0,MS|comp145106_c0,MS|comp166756_c1,MS|comp60737_c0,MS|comp142657_c0,MS|comp165307_c1,MS|comp157806_c0,MS|comp1576896_c0,MS|comp836427_c0,MS|comp136875_c0,MS|comp137340_c0,MS|comp152765_c0,MS|comp161652_c1,MS|comp159833_c2,MS|comp147693_c0,MS|comp166572_c0,MS|comp154946_c0,MS|comp152165_c1,MS|comp165185_c1,MS|comp159833_c1,MS|comp115432_c0,MS|comp121639_c0,MS|comp164536_c0,MS|comp1…
Organismal Systems	Endocrine system	GnRH signaling pathway	ko04912		MS|comp157493_c0,MS|comp101166_c0,MS|comp166756_c0,MS|comp152470_c0,MS|comp166572_c0,MS|comp157733_c0,MS|comp162554_c0,MS|comp154946_c0,MS|comp165452_c0,MS|comp152165_c1,MS|comp164164_c0,MS|comp160162_c0,MS|comp60737_c0,MS|comp166756_c1,MS|comp603980_c0,MS|comp149255_c0,MS|comp142657_c0,MS|comp150399_c0,MS|comp157806_c0,MS|comp165204_c1,MS|comp159081_c0,MS|comp161709_c1,MS|comp1576896_c0,MS|comp1…
Organismal Systems	Endocrine system	Insulin secretion	ko04911		MS|comp166889_c0,MS|comp156716_c0,MS|comp161398_c1,MS|comp163262_c0,MS|comp162709_c0,MS|comp152638_c0,MS|comp125964_c1,MS|comp163192_c1,MS|comp159717_c0,MS|comp166329_c0,MS|comp164885_c0,MS|comp165346_c1,MS|comp701709_c0,MS|comp152244_c0,MS|comp163363_c0,MS|comp118245_c0,MS|comp163262_c1,MS|comp164536_c0,MS|comp47529_c0,MS|comp165481_c0,MS|comp162422_c0,MS|comp115432_c0,MS|comp165121_c0,MS|comp16…
Organismal Systems	Endocrine system	Insulin signaling pathway	ko04910		MS|comp159455_c0,MS|comp164214_c0,MS|comp160279_c0,MS|comp128230_c0,MS|comp837260_c0,MS|comp124623_c0,MS|comp161750_c0,MS|comp140632_c0,MS|comp154985_c0,MS|comp145653_c0,MS|comp1201151_c0,MS|comp162383_c0,MS|comp145424_c0,MS|comp162923_c0,MS|comp151151_c1,MS|comp161398_c1,MS|comp166136_c0,MS|comp166452_c0,MS|comp163130_c0,MS|comp156751_c0,MS|comp155496_c0,MS|comp152299_c0,MS|comp161191_c0,MS|comp…
Organismal Systems	Endocrine system	Melanogenesis	ko04916		MS|comp55313_c0,MS|comp754819_c0,MS|comp39100_c0,MS|comp145519_c0,MS|comp164674_c0,MS|comp160444_c0,MS|comp154946_c0,MS|comp166572_c0,MS|comp157733_c0,MS|comp153710_c0,MS|comp142657_c0,MS|comp166757_c3,MS|comp603980_c0,MS|comp60737_c0,MS|comp836427_c0,MS|comp136875_c0,MS|comp162648_c0,MS|comp163860_c0,MS|comp152765_c0,MS|comp159379_c0,MS|comp149804_c0,MS|comp1576896_c0,MS|comp74472_c0,MS|comp1505…
Organismal Systems	Endocrine system	Ovarian Steroidogenesis	ko04913		MS|comp136875_c0,MS|comp1576896_c0,MS|comp144145_c0,MS|comp159081_c0,MS|comp525061_c0,MS|comp116507_c0,MS|comp137646_c0,MS|comp150399_c0,MS|comp157806_c0,MS|comp73743_c0,MS|comp165481_c0,MS|comp164536_c0,MS|comp603980_c0,MS|comp105162_c0,MS|comp162422_c0,MS|comp158848_c0,MS|comp115432_c0,MS|comp166270_c0,MS|comp161368_c0,MS|comp166329_c0,MS|comp701709_c0,MS|comp159717_c0,MS|comp125964_c1,MS|comp1…
Organismal Systems	Endocrine system	Oxytocin signaling pathway	ko04921		MS|comp125964_c1,MS|comp165346_c1,MS|comp701709_c0,MS|comp158173_c0,MS|comp165804_c0,MS|comp153525_c0,MS|comp149307_c0,MS|comp138956_c1,MS|comp161652_c0,MS|comp166889_c0,MS|comp151914_c0,MS|comp36173_c0,MS|comp161903_c0,MS|comp525061_c0,MS|comp144145_c0,MS|comp155602_c0,MS|comp165316_c0,MS|comp165481_c0,MS|comp158081_c0,MS|comp162422_c0,MS|comp165121_c0,MS|comp164674_c0,MS|comp132524_c0,MS|comp15…
Organismal Systems	Endocrine system	PPAR signaling pathway	ko03320		MS|comp165605_c0,MS|comp122144_c0,MS|comp165900_c0,MS|comp166497_c0,MS|comp650910_c0,MS|comp339866_c0,MS|comp166576_c2,MS|comp166576_c0,MS|comp151354_c0,MS|comp153408_c0,MS|comp161191_c0,MS|comp156845_c0,MS|comp1539674_c0,MS|comp161429_c0,MS|comp159758_c0,MS|comp155245_c0,MS|comp164360_c0,MS|comp164692_c0,MS|comp166108_c0,MS|comp97003_c0,MS|comp1864873_c0,MS|comp54476_c0,MS|comp1206207_c0,MS|comp…
Organismal Systems	Endocrine system	Progesterone-mediated oocyte maturation	ko04914		MS|comp161398_c1,MS|comp163130_c0,MS|comp144834_c0,MS|comp160262_c0,MS|comp162600_c0,MS|comp160409_c0,MS|comp166329_c0,MS|comp701709_c0,MS|comp159717_c0,MS|comp125964_c1,MS|comp159455_c0,MS|comp162422_c0,MS|comp115432_c0,MS|comp164824_c0,MS|comp163005_c0,MS|comp164322_c0,MS|comp165316_c0,MS|comp164536_c0,MS|comp163756_c0,MS|comp153668_c0,MS|comp51966_c0,MS|comp144145_c0,MS|comp1477080_c0,MS|comp5…
Organismal Systems	Endocrine system	Prolactin signaling pathway	ko04917		MS|comp160262_c0,MS|comp81088_c0,MS|comp141855_c0,MS|comp157733_c0,MS|comp162554_c0,MS|comp163695_c0,MS|comp152165_c1,MS|comp160409_c0,MS|comp161625_c0,MS|comp149957_c0,MS|comp147693_c0,MS|comp163130_c0,MS|comp161903_c0,MS|comp150525_c0,MS|comp123313_c0,MS|comp140632_c0,MS|comp751047_c0,MS|comp165307_c1,MS|comp137646_c0,MS|comp145653_c0,MS|comp165502_c2,MS|comp150556_c0,MS|comp165307_c0,MS|comp15…
Organismal Systems	Endocrine system	Renin-angiotensin system	ko04614		MS|comp166123_c0,MS|comp162624_c0,MS|comp166294_c0,MS|comp165956_c0,MS|comp164982_c0,MS|comp166629_c0,MS|comp162242_c0,MS|comp166222_c0,MS|comp166222_c1,MS|comp164780_c0,MS|comp501247_c0,MS|comp165956_c1,MS|comp2106591_c0,MS|comp162121_c1,MS|comp165472_c0
Organismal Systems	Endocrine system	Thyroid hormone signaling pathway	ko04919		MS|comp157098_c0,MS|comp165901_c0,MS|comp158541_c0,MS|comp166034_c0,MS|comp123313_c0,MS|comp164294_c0,MS|comp50601_c0,MS|comp166217_c0,MS|comp140487_c0,MS|comp164294_c1,MS|comp158541_c1,MS|comp165304_c0,MS|comp164762_c0,MS|comp162931_c1,MS|comp163241_c1,MS|comp163192_c0,MS|comp135177_c0,MS|comp149594_c0,MS|comp166757_c3,MS|comp163241_c0,MS|comp157733_c0,MS|comp1172050_c0,MS|comp159969_c0,MS|comp1…
Organismal Systems	Endocrine system	Thyroid hormone synthesis	ko04918		MS|comp164536_c0,MS|comp163262_c1,MS|comp165481_c0,MS|comp162422_c0,MS|comp115432_c0,MS|comp165121_c0,MS|comp157691_c0,MS|comp163557_c2,MS|comp116507_c0,MS|comp73743_c0,MS|comp144145_c0,MS|comp164118_c0,MS|comp525061_c0,MS|comp142724_c0,MS|comp141389_c0,MS|comp161652_c0,MS|comp161398_c1,MS|comp163262_c0,MS|comp495796_c0,MS|comp159717_c0,MS|comp125964_c1,MS|comp1784681_c0,MS|comp1868914_c0,MS|comp…
Organismal Systems	Environmental adaptation	Circadian entrainment	ko04713		MS|comp164674_c0,MS|comp154946_c0,MS|comp165635_c0,MS|comp166572_c0,MS|comp55313_c0,MS|comp164640_c0,MS|comp166756_c0,MS|comp166274_c0,MS|comp136875_c0,MS|comp162648_c0,MS|comp836427_c0,MS|comp152765_c0,MS|comp161652_c1,MS|comp1576896_c0,MS|comp1942077_c0,MS|comp159081_c0,MS|comp150399_c0,MS|comp157806_c0,MS|comp166648_c1,MS|comp142657_c0,MS|comp603980_c0,MS|comp166756_c1,MS|comp60737_c0,MS|comp1…
Organismal Systems	Environmental adaptation	Circadian rhythm	ko04710		MS|comp161352_c0,MS|comp165417_c1,MS|comp159063_c0,MS|comp158779_c0,MS|comp164885_c0,MS|comp157805_c0,MS|comp166274_c0,MS|comp166136_c0,MS|comp164297_c0,MS|comp92087_c0,MS|comp164275_c0,MS|comp157464_c0,MS|comp163338_c1,MS|comp161352_c1,MS|comp165417_c0,MS|comp150124_c0,MS|comp163704_c0
Organismal Systems	Environmental adaptation	Circadian rhythm - fly	ko04711		MS|comp166399_c0,MS|comp157154_c0,MS|comp150525_c0,MS|comp164297_c0,MS|comp146710_c0,MS|comp163338_c1,MS|comp157805_c0,MS|comp166274_c0
Organismal Systems	Environmental adaptation	Circadian rhythm - plant	ko04712		MS|comp1145159_c0,MS|comp163770_c0,MS|comp100851_c0,MS|comp128578_c0
Organismal Systems	Environmental adaptation	Plant-pathogen interaction	ko04626		MS|comp751491_c0,MS|comp989620_c0,MS|comp164322_c0,MS|comp2296089_c0,MS|comp165316_c0,MS|comp1215499_c0,MS|comp2413108_c0,MS|comp1477080_c0,MS|comp51966_c0,MS|comp158668_c0,MS|comp1130112_c0,MS|comp135190_c0,MS|comp155496_c0,MS|comp163933_c0,MS|comp166108_c0,MS|comp163182_c0,MS|comp116364_c0,MS|comp158173_c0,MS|comp907222_c0,MS|comp164221_c0,MS|comp60737_c0,MS|comp900561_c0,MS|comp162648_c0,MS|co…
Organismal Systems	Excretory system	Aldosterone-regulated sodium reabsorption	ko04960		MS|comp161191_c0,MS|comp163130_c0,MS|comp55313_c0,MS|comp163875_c2,MS|comp161128_c0,MS|comp96178_c0,MS|comp163262_c0,MS|comp141460_c0,MS|comp164674_c0,MS|comp133448_c0,MS|comp159969_c0,MS|comp157733_c0,MS|comp163241_c0,MS|comp160262_c0,MS|comp163262_c1,MS|comp164162_c0,MS|comp163241_c1,MS|comp160882_c0,MS|comp162264_c0,MS|comp161903_c0
Organismal Systems	Excretory system	Collecting duct acid secretion	ko04966		MS|comp745820_c0,MS|comp133681_c1,MS|comp161259_c0,MS|comp157056_c0,MS|comp122671_c0,MS|comp164424_c0,MS|comp2523137_c0,MS|comp151674_c0,MS|comp157703_c0,MS|comp158421_c1,MS|comp166340_c0,MS|comp164835_c0,MS|comp134413_c0,MS|comp158421_c0,MS|comp165045_c2,MS|comp156458_c0,MS|comp165045_c1
Organismal Systems	Excretory system	Endocrine and other factor-regulated calcium reabsorption	ko04961		MS|comp166594_c0,MS|comp165426_c0,MS|comp166329_c0,MS|comp160547_c0,MS|comp163262_c0,MS|comp165029_c1,MS|comp161398_c1,MS|comp136152_c0,MS|comp144145_c0,MS|comp142724_c0,MS|comp141389_c0,MS|comp73743_c0,MS|comp158966_c0,MS|comp163557_c2,MS|comp165121_c0,MS|comp162422_c0,MS|comp165481_c0,MS|comp163262_c1,MS|comp165029_c0,MS|comp154946_c0,MS|comp166572_c0,MS|comp163241_c0,MS|comp159969_c0,MS|comp16…
Organismal Systems	Excretory system	Proximal tubule bicarbonate reclamation	ko04964		MS|comp1655868_c0,MS|comp163262_c1,MS|comp164162_c0,MS|comp163241_c1,MS|comp158480_c1,MS|comp166678_c0,MS|comp158480_c0,MS|comp1643467_c0,MS|comp162264_c0,MS|comp2908754_c0,MS|comp160882_c0,MS|comp165320_c0,MS|comp166617_c0,MS|comp163262_c2,MS|comp110540_c0,MS|comp163262_c0,MS|comp2610837_c0,MS|comp164291_c0,MS|comp159969_c0,MS|comp163241_c0,MS|comp2073202_c0
Organismal Systems	Excretory system	Vasopressin-regulated water reabsorption	ko04962		MS|comp2342420_c0,MS|comp157806_c0,MS|comp163822_c0,MS|comp160966_c0,MS|comp159081_c0,MS|comp135642_c0,MS|comp144009_c0,MS|comp163860_c0,MS|comp68916_c0,MS|comp154912_c0,MS|comp603980_c0,MS|comp157043_c0,MS|comp2517954_c0,MS|comp166886_c0,MS|comp157043_c1,MS|comp159381_c0,MS|comp166259_c0,MS|comp1026868_c0,MS|comp163036_c0,MS|comp166611_c1,MS|comp73743_c0,MS|comp688859_c0,MS|comp144145_c0,MS|comp…
Organismal Systems	Immune system	Antigen processing and presentation	ko04612		MS|comp51966_c0,MS|comp1477080_c0,MS|comp2413108_c0,MS|comp161056_c1,MS|comp135190_c0,MS|comp1130112_c0,MS|comp776781_c0,MS|comp161690_c0,MS|comp160716_c0,MS|comp151017_c0,MS|comp123680_c0,MS|comp159833_c1,MS|comp164322_c0,MS|comp145106_c0,MS|comp160196_c0,MS|comp121639_c0,MS|comp161938_c0,MS|comp498460_c0,MS|comp165378_c0,MS|comp160688_c0,MS|comp132411_c0,MS|comp154820_c0,MS|comp164885_c0,MS|com…
Organismal Systems	Immune system	B cell receptor signaling pathway	ko04662		MS|comp163939_c0,MS|comp147693_c0,MS|comp163130_c0,MS|comp156363_c0,MS|comp160262_c0,MS|comp157733_c0,MS|comp141855_c0,MS|comp162554_c0,MS|comp147429_c0,MS|comp152165_c1,MS|comp164057_c0,MS|comp152403_c0,MS|comp160162_c0,MS|comp165227_c1,MS|comp165316_c0,MS|comp140632_c0,MS|comp150525_c0,MS|comp123313_c0,MS|comp161903_c0,MS|comp163677_c0,MS|comp155602_c0,MS|comp147868_c0,MS|comp145653_c0
Organismal Systems	Immune system	Chemokine signaling pathway	ko04062		MS|comp603980_c0,MS|comp162444_c0,MS|comp142657_c0,MS|comp157806_c0,MS|comp165307_c1,MS|comp150525_c0,MS|comp738680_c0,MS|comp1576896_c0,MS|comp152765_c0,MS|comp164734_c1,MS|comp136875_c0,MS|comp160380_c0,MS|comp164074_c0,MS|comp156363_c0,MS|comp162614_c0,MS|comp128856_c0,MS|comp147693_c0,MS|comp166572_c0,MS|comp165144_c1,MS|comp154946_c0,MS|comp152165_c1,MS|comp157555_c0,MS|comp115432_c0,MS|comp…
Organismal Systems	Immune system	Complement and coagulation cascades	ko04610		MS|comp165284_c0,MS|comp165521_c0,MS|comp152514_c0,MS|comp166634_c0,MS|comp143149_c0,MS|comp161100_c0,MS|comp642351_c0,MS|comp1887056_c0,MS|comp41095_c0,MS|comp92341_c0,MS|comp155590_c0,MS|comp155470_c0,MS|comp166161_c1,MS|comp165921_c0,MS|comp150034_c0,MS|comp160568_c0
Organismal Systems	Immune system	Cytosolic DNA-sensing pathway	ko04623		MS|comp144582_c0,MS|comp131342_c0,MS|comp156367_c0,MS|comp156507_c0,MS|comp141191_c0,MS|comp161467_c0,MS|comp156162_c0,MS|comp139233_c0,MS|comp163218_c0,MS|comp155222_c0,MS|comp160612_c0,MS|comp157935_c0,MS|comp158142_c0,MS|comp154083_c0,MS|comp162982_c0,MS|comp144103_c0,MS|comp164057_c0,MS|comp161112_c0,MS|comp155127_c0,MS|comp99972_c0,MS|comp131265_c0,MS|comp145799_c0,MS|comp164368_c0
Organismal Systems	Immune system	Fc epsilon RI signaling pathway	ko04664		MS|comp165316_c0,MS|comp159455_c0,MS|comp164164_c0,MS|comp160162_c0,MS|comp145653_c0,MS|comp157824_c0,MS|comp161903_c0,MS|comp123313_c0,MS|comp140632_c0,MS|comp166034_c0,MS|comp163677_c0,MS|comp147693_c0,MS|comp163130_c0,MS|comp156363_c0,MS|comp161191_c0,MS|comp147429_c0,MS|comp160409_c0,MS|comp152165_c1,MS|comp152403_c0,MS|comp160262_c0,MS|comp141855_c0,MS|comp157733_c0,MS|comp162554_c0
Organismal Systems	Immune system	Fc gamma R-mediated phagocytosis	ko04666		MS|comp147693_c0,MS|comp128856_c0,MS|comp55313_c0,MS|comp164452_c0,MS|comp156363_c0,MS|comp157493_c0,MS|comp165881_c0,MS|comp147302_c0,MS|comp149821_c1,MS|comp163680_c1,MS|comp165881_c3,MS|comp159652_c0,MS|comp165452_c0,MS|comp164674_c0,MS|comp159530_c0,MS|comp149821_c0,MS|comp157470_c0,MS|comp160754_c0,MS|comp166346_c1,MS|comp161552_c0,MS|comp164985_c1,MS|comp162360_c0,MS|comp123313_c0,MS|comp16…
Organismal Systems	Immune system	Hematopoietic cell lineage	ko04640		MS|comp162121_c1,MS|comp166629_c0,MS|comp152514_c0,MS|comp159326_c0,MS|comp164780_c0,MS|comp162624_c0
Organismal Systems	Immune system	Intestinal immune network for IgA production	ko04672		MS|comp159326_c0
Organismal Systems	Immune system	Leukocyte transendothelial migration	ko04670		MS|comp164674_c0,MS|comp143088_c0,MS|comp151067_c0,MS|comp55313_c0,MS|comp165563_c0,MS|comp156363_c0,MS|comp162614_c0,MS|comp157493_c0,MS|comp2385162_c0,MS|comp160380_c0,MS|comp166542_c0,MS|comp166034_c0,MS|comp738680_c0,MS|comp164253_c0,MS|comp149594_c0,MS|comp164712_c1,MS|comp60747_c0,MS|comp55389_c0,MS|comp162444_c0,MS|comp161950_c0,MS|comp166786_c1,MS|comp147429_c0,MS|comp141479_c0,MS|comp166…
Organismal Systems	Immune system	NOD-like receptor signaling pathway	ko04621		MS|comp164322_c0,MS|comp161898_c0,MS|comp159455_c0,MS|comp162269_c0,MS|comp1130112_c0,MS|comp135190_c0,MS|comp156480_c0,MS|comp161903_c0,MS|comp2413108_c0,MS|comp51966_c0,MS|comp1477080_c0,MS|comp133901_c0,MS|comp160409_c0,MS|comp164057_c0,MS|comp1388584_c0,MS|comp163373_c1,MS|comp282366_c0,MS|comp944555_c0,MS|comp163373_c0
Organismal Systems	Immune system	Natural killer cell mediated cytotoxicity	ko04650		MS|comp165307_c1,MS|comp154985_c0,MS|comp166034_c0,MS|comp140632_c0,MS|comp161903_c0,MS|comp163677_c0,MS|comp147868_c0,MS|comp145653_c0,MS|comp160162_c0,MS|comp166700_c0,MS|comp165307_c0,MS|comp165316_c0,MS|comp165227_c1,MS|comp163645_c0,MS|comp141855_c0,MS|comp157733_c0,MS|comp162554_c0,MS|comp160262_c0,MS|comp162825_c0,MS|comp164674_c0,MS|comp152403_c0,MS|comp147429_c0,MS|comp152165_c1,MS|comp1…
Organismal Systems	Immune system	RIG-I-like receptor signaling pathway	ko04622		MS|comp160409_c0,MS|comp161616_c0,MS|comp164057_c0,MS|comp152231_c0,MS|comp163373_c1,MS|comp163373_c0,MS|comp144103_c0,MS|comp162179_c1,MS|comp162179_c0,MS|comp1588654_c0,MS|comp161257_c0,MS|comp158142_c0,MS|comp161898_c0,MS|comp159455_c0,MS|comp147823_c0,MS|comp163999_c0,MS|comp158127_c0
Organismal Systems	Immune system	T cell receptor signaling pathway	ko04660		MS|comp738680_c0,MS|comp147868_c0,MS|comp166034_c0,MS|comp150525_c0,MS|comp123313_c0,MS|comp108497_c0,MS|comp160162_c0,MS|comp165227_c1,MS|comp159802_c0,MS|comp162554_c0,MS|comp157733_c0,MS|comp164057_c0,MS|comp152165_c1,MS|comp165562_c0,MS|comp157493_c0,MS|comp163939_c0,MS|comp147693_c0,MS|comp156363_c0,MS|comp155602_c0,MS|comp161903_c0,MS|comp140632_c0,MS|comp145653_c0,MS|comp160279_c0,MS|comp1…
Organismal Systems	Immune system	Toll-like receptor signaling pathway	ko04620		MS|comp163373_c1,MS|comp164057_c0,MS|comp147429_c0,MS|comp160409_c0,MS|comp144103_c0,MS|comp163373_c0,MS|comp160262_c0,MS|comp120621_c0,MS|comp163130_c0,MS|comp147693_c0,MS|comp153948_c0,MS|comp136702_c0,MS|comp157824_c0,MS|comp155602_c0,MS|comp163677_c0,MS|comp130852_c0,MS|comp123313_c0,MS|comp161903_c0,MS|comp165316_c0,MS|comp161898_c0,MS|comp55912_c0,MS|comp158142_c0,MS|comp164164_c0,MS|comp16…
Organismal Systems	Nervous system	Cholinergic synapse	ko04725		MS|comp132814_c0,MS|comp55313_c0,MS|comp147693_c0,MS|comp166756_c0,MS|comp160354_c0,MS|comp154946_c0,MS|comp57851_c0,MS|comp157733_c0,MS|comp166572_c0,MS|comp151943_c0,MS|comp132524_c0,MS|comp124521_c0,MS|comp164674_c0,MS|comp165241_c1,MS|comp142657_c0,MS|comp165482_c0,MS|comp166756_c1,MS|comp603980_c0,MS|comp159081_c0,MS|comp123313_c0,MS|comp1576896_c0,MS|comp157806_c0,MS|comp150399_c0,MS|comp15…
Organismal Systems	Nervous system	Dopaminergic synapse	ko04728		MS|comp162648_c0,MS|comp163860_c0,MS|comp147868_c0,MS|comp123313_c0,MS|comp157656_c0,MS|comp137918_c0,MS|comp161234_c0,MS|comp164674_c0,MS|comp152979_c0,MS|comp118662_c0,MS|comp1065971_c0,MS|comp166756_c0,MS|comp164054_c0,MS|comp165939_c0,MS|comp154380_c0,MS|comp154698_c0,MS|comp164118_c0,MS|comp165108_c1,MS|comp2893866_c0,MS|comp165481_c0,MS|comp165121_c0,MS|comp165519_c0,MS|comp151594_c0,MS|com…
Organismal Systems	Nervous system	GABAergic synapse	ko04727		MS|comp2908754_c0,MS|comp525061_c0,MS|comp144145_c0,MS|comp73743_c0,MS|comp135243_c0,MS|comp116507_c0,MS|comp166611_c1,MS|comp159483_c0,MS|comp5974_c0,MS|comp146389_c0,MS|comp166250_c1,MS|comp164536_c0,MS|comp162859_c0,MS|comp151594_c0,MS|comp159429_c0,MS|comp157555_c0,MS|comp162422_c0,MS|comp115432_c0,MS|comp160330_c0,MS|comp166611_c0,MS|comp701709_c0,MS|comp166329_c0,MS|comp164291_c0,MS|comp166…
Organismal Systems	Nervous system	Glutamatergic synapse	ko04724		MS|comp159918_c0,MS|comp161398_c1,MS|comp159717_c0,MS|comp166329_c0,MS|comp164291_c0,MS|comp5974_c0,MS|comp164536_c0,MS|comp159483_c0,MS|comp115432_c0,MS|comp157555_c0,MS|comp86366_c0,MS|comp163557_c2,MS|comp73743_c0,MS|comp116507_c0,MS|comp142724_c0,MS|comp141389_c0,MS|comp164640_c0,MS|comp55313_c0,MS|comp159514_c0,MS|comp164213_c0,MS|comp165452_c0,MS|comp166572_c0,MS|comp165635_c0,MS|comp154946…
Organismal Systems	Nervous system	Long-term depression	ko04730		MS|comp142657_c0,MS|comp166648_c1,MS|comp166756_c1,MS|comp1942077_c0,MS|comp152765_c0,MS|comp161652_c1,MS|comp164054_c0,MS|comp160050_c0,MS|comp164640_c0,MS|comp55313_c0,MS|comp166756_c0,MS|comp154946_c0,MS|comp118662_c0,MS|comp166572_c0,MS|comp157733_c0,MS|comp164674_c0,MS|comp2559128_c0,MS|comp86366_c0,MS|comp165121_c0,MS|comp165481_c0,MS|comp159483_c0,MS|comp164200_c0,MS|comp165316_c0,MS|comp1…
Organismal Systems	Nervous system	Long-term potentiation	ko04720		MS|comp164674_c0,MS|comp157733_c0,MS|comp166572_c0,MS|comp165635_c0,MS|comp154946_c0,MS|comp166756_c0,MS|comp55313_c0,MS|comp152765_c0,MS|comp161652_c1,MS|comp159379_c0,MS|comp136875_c0,MS|comp162648_c0,MS|comp836427_c0,MS|comp157806_c0,MS|comp147868_c0,MS|comp1576896_c0,MS|comp166756_c1,MS|comp60737_c0,MS|comp166757_c3,MS|comp142657_c0,MS|comp141303_c0,MS|comp165227_c1,MS|comp125964_c1,MS|comp11…
Organismal Systems	Nervous system	Neurotrophin signaling pathway	ko04722		MS|comp160409_c0,MS|comp118117_c0,MS|comp147429_c0,MS|comp141479_c0,MS|comp165346_c1,MS|comp116364_c0,MS|comp158173_c0,MS|comp166474_c0,MS|comp141855_c0,MS|comp160262_c0,MS|comp155727_c0,MS|comp162825_c0,MS|comp155496_c0,MS|comp163688_c0,MS|comp161191_c0,MS|comp165798_c1,MS|comp156321_c0,MS|comp163130_c0,MS|comp66733_c0,MS|comp165798_c0,MS|comp145653_c0,MS|comp161903_c0,MS|comp154985_c0,MS|comp14…
Organismal Systems	Nervous system	Retrograde endocannabinoid signaling	ko04723		MS|comp166756_c1,MS|comp603980_c0,MS|comp142657_c0,MS|comp137918_c0,MS|comp161652_c1,MS|comp152765_c0,MS|comp136875_c0,MS|comp150399_c0,MS|comp157806_c0,MS|comp159081_c0,MS|comp359644_c0,MS|comp1576896_c0,MS|comp166756_c0,MS|comp164640_c0,MS|comp55313_c0,MS|comp18376_c0,MS|comp162147_c0,MS|comp79119_c0,MS|comp164674_c0,MS|comp166572_c0,MS|comp133892_c0,MS|comp154946_c0,MS|comp146389_c0,MS|comp164…
Organismal Systems	Nervous system	Serotonergic synapse	ko04726		MS|comp152765_c0,MS|comp164407_c0,MS|comp161652_c1,MS|comp437441_c0,MS|comp157806_c0,MS|comp359644_c0,MS|comp144825_c0,MS|comp166756_c1,MS|comp146278_c0,MS|comp159908_c0,MS|comp142657_c0,MS|comp157656_c0,MS|comp137918_c0,MS|comp164674_c0,MS|comp153742_c0,MS|comp152979_c0,MS|comp157733_c0,MS|comp147901_c0,MS|comp166572_c0,MS|comp154946_c0,MS|comp166756_c0,MS|comp55313_c0,MS|comp2377284_c0,MS|comp1…
Organismal Systems	Nervous system	Synaptic vesicle cycle	ko04721		MS|comp166611_c0,MS|comp160547_c0,MS|comp163363_c0,MS|comp164972_c0,MS|comp165045_c2,MS|comp158421_c0,MS|comp165426_c0,MS|comp166594_c0,MS|comp156716_c0,MS|comp1731057_c0,MS|comp166340_c0,MS|comp165029_c1,MS|comp165077_c1,MS|comp158421_c1,MS|comp161259_c0,MS|comp164424_c0,MS|comp151674_c0,MS|comp2523137_c0,MS|comp156670_c0,MS|comp166611_c1,MS|comp745820_c0,MS|comp164342_c1,MS|comp159429_c0,MS|com…
Organismal Systems	Sensory system	Inflammatory mediator regulation of TRP channels	ko04750		MS|comp166572_c0,MS|comp154946_c0,MS|comp164674_c0,MS|comp166756_c0,MS|comp164452_c0,MS|comp55313_c0,MS|comp2377284_c0,MS|comp150399_c0,MS|comp157806_c0,MS|comp1576896_c0,MS|comp495424_c0,MS|comp159081_c0,MS|comp144825_c0,MS|comp166034_c0,MS|comp162648_c0,MS|comp136875_c0,MS|comp836427_c0,MS|comp161652_c1,MS|comp164407_c0,MS|comp152765_c0,MS|comp603980_c0,MS|comp146278_c0,MS|comp166756_c1,MS|comp…
Organismal Systems	Sensory system	Olfactory transduction	ko04740		MS|comp60737_c0,MS|comp603980_c0,MS|comp164536_c0,MS|comp159081_c0,MS|comp157806_c0,MS|comp162648_c0,MS|comp836427_c0,MS|comp1042577_c0,MS|comp161398_c1,MS|comp155496_c0,MS|comp165987_c0,MS|comp116364_c0,MS|comp166329_c0,MS|comp165346_c1,MS|comp2237618_c0,MS|comp158173_c0
Organismal Systems	Sensory system	Phototransduction	ko04744		MS|comp116364_c0,MS|comp51272_c0,MS|comp158173_c0,MS|comp162648_c0,MS|comp836427_c0,MS|comp154396_c0,MS|comp165144_c1,MS|comp717657_c0,MS|comp155496_c0,MS|comp60737_c0
Organismal Systems	Sensory system	Phototransduction - fly	ko04745		MS|comp165312_c0,MS|comp165346_c1,MS|comp116364_c0,MS|comp141642_c0,MS|comp153096_c0,MS|comp158173_c0,MS|comp19652_c0,MS|comp60730_c0,MS|comp95379_c0,MS|comp149594_c1,MS|comp162718_c1,MS|comp155496_c0,MS|comp149307_c0,MS|comp161652_c0,MS|comp142724_c0,MS|comp166246_c1,MS|comp141389_c0,MS|comp1210908_c0,MS|comp166336_c1,MS|comp163557_c2,MS|comp165121_c0,MS|comp157555_c0,MS|comp156377_c1,MS|comp166…
Organismal Systems	Sensory system	Taste transduction	ko04742		MS|comp161398_c1,MS|comp157555_c0,MS|comp165481_c0,MS|comp1576896_c0,MS|comp157806_c0,MS|comp136875_c0,MS|comp166329_c0,MS|comp125964_c1
